# StormGraph: A graph-based algorithm for quantitative clustering analysis of diverse single-molecule localization microscopy data.

Joshua M. Scurll<sup>1,2</sup>, Libin Abraham<sup>2,3</sup>, Da Wei Zheng<sup>1</sup>, Reza Tafteh<sup>4</sup>, Keng C. Chou<sup>4</sup>,  
Michael R. Gold<sup>2,3</sup>, Daniel Coombs<sup>1</sup>

<sup>1</sup> Department of Mathematics and Institute of Applied Mathematics, 1984 Mathematics Road, University of British Columbia, Vancouver, British Columbia V6T 1Z2 Canada,

<sup>2</sup> Life Sciences Institute I<sup>3</sup> and Cell Research Groups, University of British Columbia, 2350 Health Sciences Mall, Vancouver, British Columbia V6T 1Z3 Canada,

<sup>3</sup> Department of Microbiology and Immunology, University of British Columbia, 2350 Health Sciences Mall, Vancouver, British Columbia V6T 1Z3 Canada,

<sup>4</sup> Department of Chemistry, University of British Columbia, Vancouver, British Columbia V6T 1Z1 Canada

## Corresponding authors

Joshua M. Scurll and Daniel Coombs

Department of Mathematics and Institute of Applied Mathematics

1984 Mathematics Road, University of British Columbia

Vancouver, British Columbia V6T 1Z2 Canada

Phone: +1-604-446-0450 (JMS); +1-604-822-2859 (DC)

E-mail: [jscurll.ubc@gmail.com](mailto:jscurll.ubc@gmail.com); [coombs@math.ubc.ca](mailto:coombs@math.ubc.ca)

**Keywords:** single-molecule localization microscopy, dSTORM, heterogeneous clustering, graph community detection, hierarchical clustering, B cell receptor, colocalization.

## 1 **Abstract**

2 Clustering of proteins is crucial for many cellular processes and can be imaged at nanoscale resolution using  
3 single-molecule localization microscopy (SMLM). Ideally, molecular clustering in regions of interest (ROIs)  
4 from SMLM images would be assessed using computational methods that are robust to sample and experi-  
5 mental heterogeneity, account for uncertainties in localization data, can analyze both 2D and 3D data, and  
6 have practical computational requirements in terms of time and hardware. While analyzing surface protein  
7 clustering on B lymphocytes using SMLM, we encountered limitations with existing cluster analysis meth-  
8 ods. This inspired us to develop StormGraph, an algorithm using graph theory and community detection to  
9 identify clusters in heterogeneous sets of 2D and 3D SMLM data while accounting for localization uncertain-  
10 ties. StormGraph generates both multi-level and single-level clusterings and can quantify cluster overlap for  
11 two-color SMLM data. Importantly, StormGraph automatically determines scale-dependent thresholds from  
12 the data using scale-independent input parameters. This makes identical choices of input parameter values  
13 suitable for disparate ROIs, eliminating the need to tune parameters for different ROIs in heterogeneous  
14 SMLM datasets. We show that StormGraph outperforms existing algorithms at analyzing heterogeneous  
15 sets of simulated SMLM ROIs where ground-truth clusters are known. Applying StormGraph to real SMLM  
16 data in 2D, we reveal that B-cell antigen receptors (BCRs) reside in a heterogeneous combination of small  
17 and large clusters following stimulation, which suggests for the first time that two conflicting models of BCR  
18 activation are not mutually exclusive. We also demonstrate application of StormGraph to real two-color and  
19 3D SMLM data.

## 20 Introduction

21 Single-molecule localization microscopy (SMLM) is commonly used to investigate nanoscale clustering of  
22 cell-membrane and intracellular proteins in selected cellular regions of interest (ROIs) (1; 2; 3; 4; 5; 6; 7; 8;  
23 9; 10). SMLM techniques, such as direct stochastic optical reconstruction microscopy (dSTORM) (11; 12)  
24 and photoactivated localization microscopy (PALM) (13), overcome the diffraction limit of conventional  
25 microscopy by acquiring many sequential images, each containing very few fluorescing labels. Individual  
26 labels can then be computationally super-resolved and precisely localized to generate localization coordinates,  
27 often with estimated positional uncertainties (14; 15; 16). This is possible in both two and three dimensions  
28 (17; 18; 19; 20).

29 SMLM data usually exhibits ROI-to-ROI and within-ROI heterogeneity due to biological and technical  
30 variability between imaged cells and to the spatial heterogeneity of the plasma membrane, intracellular com-  
31 partments, and cytoplasm. Nevertheless, clustering is frequently analyzed using spatial summary statistics  
32 that fail to capture the heterogeneity of clusters within ROIs, for example Ripley's functions (21; 22). Over  
33 the last six years, we have regularly applied such methods ourselves to dSTORM data as part of investi-  
34 gations of the spatial distributions of cell-surface molecules on B cells in relation to B-cell antigen receptor  
35 (BCR) signaling. For more informative analysis, clusters can be individually quantified by using a clustering  
36 algorithm to assign localizations to specific clusters (23; 24; 25; 26; 27; 28; 29; 30; 31). However, challenged  
37 by large numbers and diversity of ROIs, we had difficulty using existing algorithms to achieve consistent  
38 analysis of nanoscale BCR clustering on tens or hundreds of B cells imaged by dSTORM. We consequently  
39 developed our own method, which we call StormGraph.

40 Herein, we describe and demonstrate the use of StormGraph, a comprehensive graph-based clustering  
41 algorithm inspired by PhenoGraph (32) from the single-cell cytometry field. StormGraph converts SMLM  
42 data into a graph using localization coordinates and their uncertainties to specify nodes and weighted edges.  
43 It then utilizes graph theory and community detection (33) to assign nodes to clusters. StormGraph makes  
44 no assumptions about the shapes of clusters, has both 2D and 3D implementations, and can quantify cluster  
45 overlap for two-color SMLM data. Using Monte Carlo simulations, StormGraph automatically adapts key  
46 thresholds to each ROI independently. This allows users to keep input parameters fixed across all ROIs  
47 in an experiment without introducing systematic bias to the analysis. Additionally, StormGraph generates  
48 a multi-level (i.e. hierarchical) clustering whereby clusters are recursively composed of smaller clusters.  
49 Examples of multi-level clustering possible in SMLM data include multiscale organization of RNA polymerase  
50 in *Escherichia coli* (34) and clustering of receptor oligomers, themselves clusters of molecules, into lipid

51 rafts. By outputting a multi-level clustering, StormGraph simplifies multiscale cluster analysis compared  
52 to repeatedly changing parameters for existing methods. Notwithstanding, StormGraph also generates an  
53 appropriate single-level clustering to facilitate easy-to-interpret analysis. To streamline analysis of ROIs from  
54 many samples, we developed software to manually crop ROIs from one or two SMLM color channels and  
55 subsequently batch analyze them with StormGraph. We believe that StormGraph has certain advantages  
56 over other clustering algorithms in the SMLM literature.

57 The most widely used clustering algorithms in SMLM literature, including Density-Based Spatial Cluster-  
58 ing of Applications with Noise (DBSCAN) (23), identify clusters based on a user-specified minimum number  
59 of points within a user-specified radius. The optimal values of their parameters depend on the density of  
60 the data, but the localization density typically varies between ROIs. Consequently, the common practice  
61 of fixing these parameters while analyzing multiple ROIs can systematically bias cluster analyses because  
62 the parameter choice may be inappropriate for many of the ROIs. The alternative approach of choosing  
63 different parameter values for each ROI would introduce an enormous amount of subjective bias, especially  
64 because parameter selection is usually challenging even for a single ROI. Alternative algorithms based on  
65 Voronoi diagrams have been developed for 2D (24; 25) and 3D SMLM data (26) and address these problems  
66 in different ways.

67 A Voronoi diagram divides an ROI into tessellated “Voronoi cells” (polygons in 2D or polyhedra in 3D)  
68 whereby each Voronoi cell encloses one localization and all regions of space that are closer to it than to  
69 any other localization. Both SR-Tesseler (24) and ClusterViSu (25) construct Voronoi diagrams, then apply  
70 thresholds to the Voronoi cells, and finally group adjacent Voronoi cells into clusters. However, they differ  
71 in how they determine thresholds. SR-Tesseler provides users with several options for setting thresholds,  
72 but the leading option sets a single threshold on density (defined as reciprocal of Voronoi polygon area)  
73 equal to a user-specified constant multiplicative factor,  $\alpha$ , of the average density of localizations in the  
74 ROI. This automatically adapts the density threshold to the average localization density in each ROI but  
75 neglects the variance that would be expected for randomly distributed localizations. ClusterViSu similarly  
76 applies a single threshold to Voronoi polygon areas, but it uses Monte Carlo simulations to automatically  
77 set the density threshold equal to the cutoff at which Voronoi polygon areas appear more frequently in  
78 the actual data than in random data. This is in contrast to the spatially uniform (i.e. evenly spaced)  
79 null reference distribution of localizations that SR-Tesseler uses. Although the approach of ClusterViSu  
80 adds computational expense, it eliminates user influence from calculation of the threshold, and the authors  
81 of ClusterViSu demonstrated that it is more robust than SR-Tesseler over a large range of background

82 localization densities (25). Inspired by ClusterViSu, StormGraph overcomes the parameter selection problem  
83 of density-based clustering algorithms (e.g. DBSCAN) by using density-independent input parameters, which  
84 users can keep fixed, and then automatically adapting density-dependent thresholds to each ROI using Monte  
85 Carlo simulations.

86 Although ClusterViSu is an attractive method for analyzing datasets with ROI-to-ROI heterogeneity,  
87 none of the methods described so far account for positional uncertainties in SMLM localizations. These are  
88 often output from the initial processing of raw data, alongside the most probable localization positions, and  
89 provide additional information that can be exploited to improve clustering results. Two methods based on  
90 DBSCAN use this information to some extent. One is a pixelated method specifically for 2D data (27), and  
91 the other corrects cluster-size distributions, but not actual clusters, determined using regular DBSCAN (28).  
92 Most appealing, a Bayesian, model-based clustering algorithm applicable to 2D or 3D data (29; 30) builds  
93 the positional uncertainty of each localization into the cluster detection process. However, it assumes that  
94 all clusters in an ROI have circular or spherical Gaussian profiles of similar size. This potentially limits its  
95 suitability for data with clusters of elongated or unusual shapes or heterogeneous sizes. Furthermore, among  
96 existing SMLM cluster analysis methods, the Bayesian method has the most user-adjustable settings, which  
97 can be non-intuitive (e.g. Dirichlet concentration parameter) or difficult to determine (e.g. Bayesian priors).  
98 Also, slow computation times limit its practicality, with the method typically requiring  $\sim 30$  minutes on a  
99 standard desktop computer to analyze one ROI containing 1,000 localizations (30), which is less than one  
100 tenth of the number of localizations that we routinely acquire per ROI. In contrast, StormGraph makes use  
101 of all available positional uncertainties for 2D or 3D localization data without imposing assumptions about  
102 cluster shapes or sizes or requiring excessive computation times.

103 Herein, we describe StormGraph and its capabilities, and we use simulated data to compare its per-  
104 formance to that of DBSCAN, ClusterViSu, and the Bayesian method. We then apply StormGraph to  
105 characterize nanoscale BCR clustering from heterogeneous 2D SMLM data, which delivers novel insights  
106 into BCR organization in resting and activated B cells. We also demonstrate StormGraph's ability to quan-  
107 tify 3D clusters of the lysosomal protein LAMP-1 and to quantify cluster overlap for two-color SMLM data.

## 108 Results

### 109 The StormGraph algorithm

110 As input to the clustering algorithm, StormGraph takes ROIs that have been selected manually from field-  
111 of-view SMLM images, for example using our software. The ROIs should be completely enclosed within the  
112 boundaries of imaged cells because StormGraph, like other cluster analysis methods including ClusterViSu  
113 and Ripley’s functions, compares the data to a completely uniformly random ‘null’ distribution of points.  
114 This choice of null distribution is not appropriate for any ROI that contains unoccupied coverslip space as  
115 such spaces should remain empty in the null distribution. Besides, keeping ROIs within cell boundaries  
116 is generally necessary for 2D data to avoid artifacts of projecting 3D cell-membrane curvature onto two  
117 dimensions.

118 To identify clusters in an ROI, dense localization neighborhoods must be identified. To this end, Storm-  
119 Graph first determines an ROI-specific length scale  $r_0$  from the data using either of two methods (see  
120 Methods and Figure S1). The preferred method uses an input parameter  $k$ , which specifies a number of  
121 nearest neighbors of each localization. The computation of  $r_0$  then resembles the automatic threshold com-  
122 putation in ClusterViSu but using distance to  $k^{\text{th}}$  nearest neighbor (kNN) in lieu of Voronoi polygon area.  
123 To reduce user input, StormGraph alternatively offers a fully automatic but heuristic method to compute  
124  $r_0$  by seeking a balance between inter-localization and inter-cluster distances without any user-adjustable  
125 parameters. This heuristic method is intended for visually well clustered data with very few dispersed local-  
126 izations between clusters, but we nonetheless found that it produces comparable StormGraph results to the  
127 universally applicable kNN method even for unintended use cases.

128 Next, using the localizations as nodes (Figure 1a), StormGraph essentially constructs a weighted  $r_0$ -  
129 neighborhood graph (Figure 1b) as follows. Define the similarity,  $s_{ij}$ , of two nodes,  $i$  and  $j$ , to be

$$s_{ij} = \begin{cases} 1 - r_{ij}/r_0 & \text{if } r_{ij} \leq r_0, \\ 0 & \text{if } r_{ij} > r_0, \end{cases}$$

130 where  $r_{ij}$  is the Euclidean distance between nodes  $i$  and  $j$ . If localization coordinate uncertainties are  
131 unknown, then StormGraph assigns to each node pair  $\{i, j\}$  an edge of weight  $W_{ij} = s_{ij}$ . Otherwise,  
132 StormGraph uses the uncertainties to estimate  $\langle s_{ij} \rangle$ , the expectation of the similarity  $s_{ij}$ , from Monte Carlo  
133 simulations (Methods) and assigns  $W_{ij} = \langle s_{ij} \rangle$ .

134 At this stage, unclustered localizations are identified and removed by applying a threshold to the weighted  
135 node degree,

$$\text{deg}(i) = \sum_{j \neq i} W_{ij},$$

136 a proxy for local density. In principle, nodes can be classified as unclustered and removed (reported as  
137 ‘cluster 0’ in StormGraph’s output) if their degree falls below a data-dependent threshold (Figure 1c).  
138 StormGraph automatically determines this threshold from random point clouds using the user-defined pa-  
139 rameter  $\alpha$  (Methods), which is a per-localization significance level for the null hypothesis that localizations  
140 are randomly distributed. StormGraph’s default value of  $\alpha$  is 0.05, but users may alter this within the range  
141  $0 \leq \alpha \leq 1$ . Figure S2 illustrates the effects of varying the parameters  $\alpha$  and  $k$  for an SMLM ROI with  
142 ambiguous clusters.

143 The graph is then regenerated using a new  $r_0$  value determined completely automatically, using the  
144 heuristic method, from only the retained nodes. If localization coordinate uncertainties are available, edges  
145 are subsequently pruned from the graph to ensure that all retained pairs of edges have at least an estimated  
146 50% probability of co-occurring in the  $r_0$ -neighborhood graph for the unknown true localization positions  
147 (Methods). Without edge pruning, the average graph contains all edges that occur in at least one Monte  
148 Carlo simulation. Consequently, the average graph can contain combinations of edges that rarely or never  
149 co-occur in the simulations and therefore its connectivity will not necessarily reflect the true cluster structure  
150 of the data. The edge pruning addresses this by ensuring that any pair of retained edges co-occur at least as  
151 often as not. StormGraph then finds a hierarchy of node clusters (Figure 1e) using the multi-level Infomap  
152 community detection algorithm (35), followed by additional cluster merging when warranted (Methods).

153 To obtain a single-level clustering from the hierarchy, we developed a novel, fast method motivated by  
154 the idea of consensus clustering (36; 37). Briefly, starting at the top of the cluster hierarchy, clusters are  
155 recursively divided into their coarsest constituent subclusters until they no longer bear similarity to connected  
156 components of an alternative neighborhood graph based on mutual nearest neighbors (Methods). Optionally,  
157 the user may specify a desired minimum number of localizations per cluster (MinCluSize). This will impose  
158 a limit on how far clusters can be subdivided if the stopping criterion is not already met and it will exclude  
159 clusters containing fewer than MinCluSize localizations from downstream analyses. As output, StormGraph  
160 provides the single-level and multi-level cluster assignments of every localization. Combined with localization  
161 coordinates, this provides the information necessary to quantify individual cluster properties, such as area

162 (Figure 1d) and number of localizations per cluster. Our software automatically quantifies the single-level  
163 and coarsest-level clusterings.

164 A common caveat of SMLM is multiple counting of single molecules, often causing single molecules  
165 to spuriously appear as clusters. This can be due to multiple labeling of single molecules or to repeated  
166 photoblinking of individual fluorophores. Therefore, StormGraph includes optional functionality, using a  
167 statistical approach revolving around localization uncertainties, to reclassify as unclustered localizations any  
168 putative clusters that cannot be confidently distinguished from multiply counted single molecules (Methods).  
169 However, like other clustering algorithms, StormGraph does not attempt to infer the number or positions  
170 of actual molecules. Hence, we caution that reporting localization numbers, instead of cluster areas for  
171 example, can mislead biological interpretation of real SMLM data.

172 We note one potential limitation of StormGraph. Infomap, like other leading community detection  
173 algorithms, is not guaranteed to produce identical results from repeat runs. Monte Carlo simulations also  
174 introduce stochastic variability between repeat runs of StormGraph. However, discrepancies between the  
175 clusters output by identical repeat runs of StormGraph indicate that clusters have ambiguous boundaries and  
176 therefore that there are multiple ways in which the localizations can be rationally partitioned into clusters.  
177 Nonetheless, we tested the reproducibility of StormGraph and found that the clusters generated by identical  
178 repeat runs of StormGraph for a heterogeneous dSTORM ROI containing visually ill-defined clusters were  
179 highly similar (Figure S3; see Methods).

## 180 **Validation using simulated data and comparison to other algorithms**

181 To compare StormGraph with DBSCAN and ClusterViSu, we simulated 64 diverse  $2\ \mu\text{m} \times 2\ \mu\text{m}$  ROIs  
182 containing isolated and heterogeneously aggregated circular nanoclusters (e.g. Figure 2a–c; Methods). Out-  
183 side the clusters we added randomly distributed molecules. Individual simulated molecules were allowed to  
184 yield multiple localizations, each with a positional uncertainty sampled from a real dSTORM experiment.  
185 We tested both the automatic and kNN ( $k = 10, 15$  or  $20$ ) methods for determining  $r_0$  while maintaining  
186  $\alpha = 0.05$ . Although the MinCluSize parameter is not required by StormGraph, we found that ClusterViSu  
187 would often detect many small, spurious ‘clusters’, even as small as just one localization, if we did not set a  
188 minimum number of localizations needed for a cluster to be retained. We therefore set a minimum cluster  
189 size of 5 localizations in ClusterViSu, and since MinCluSize functions similarly in StormGraph, we set it  
190 equally in order to make a fair comparison between the two algorithms. For DBSCAN, we tested 16 different  
191 parameter choices based on the underlying parameters used for data simulation, although such knowledge



192 is generally unavailable for real data. To assess cluster assignments by each algorithm, we used normalized  
193 mutual information (NMI) (38) and mean F-measure (39). Higher values indicate superior performance. We  
194 also evaluated resulting errors in cluster quantification. For each simulated ROI, we calculated the resultant  
195 errors in the mean ( $\mu$ ) and standard deviation ( $\sigma$ ) of the number of localizations per cluster and in the  
196 overall percentage of localizations assigned to clusters. We report these errors as fractions of (i.e. relative  
197 to) the ground-truth quantification values. Thus, errors lie between  $-1$  (i.e.  $-100\%$  error) and  $+\infty$  with  $0$   
198 indicating zero error.

199 According to NMI and mean F-measure, StormGraph consistently outperformed ClusterViSu and gen-  
200 erally performed better than DBSCAN regardless of parameter choice (Figures 2d and S4). DBSCAN's  
201 performance was very sensitive to the choice of parameters and no single choice was suitable for all of the  
202 data (Figure S5), demonstrating its unsuitability for analyzing multiple diverse ROIs. In terms of cluster  
203 quantification, the errors associated with StormGraph grouped closer to zero than the errors for either Clus-  
204 terViSu or DBSCAN (Figure 2e-f). For visual appreciation, specific quantification errors and NMI values for  
205 the three example simulations in Figure 2a-c are shown in Figure S4. ClusterViSu tended to substantially  
206 underestimate the mean and variance of the number of localizations per cluster, presumably because it de-  
207 tected too many small spurious clusters. Quantification errors by DBSCAN were close to zero for many of  
208 the ROIs, but the occurrence of some large errors reinforces its unsuitability for analyzing multiple diverse  
209 ROIs. Meanwhile, StormGraph was very robust for values of  $k$  ranging from 10 to 20 when using the kNN  
210 method to set  $r_0$ , and it was similarly robust for the automated heuristic method of setting  $r_0$  (Figures  
211 2d and S4). Inspection of the quantification errors reveals that cluster quantification by StormGraph was  
212 generally more accurate when localization uncertainties were utilized (Figure S4). Even so, NMI and mean  
213 F-measure showed that StormGraph outperformed both ClusterViSu and DBSCAN whether localization  
214 uncertainties were utilized or not (Figures 2d and S4).

215 Nonetheless, clustering algorithms cannot be expected to achieve perfect results. Despite the existence  
216 of a ground truth in each of our simulated ROIs, three contributions to their realism posed hurdles to  
217 algorithms identifying the true clusters. Firstly, distinct ground-truth clusters could appear very close  
218 together by chance and therefore be almost indistinguishable as separate clusters. This is apparent in Figure  
219 2a-c. Secondly, molecules were distributed randomly among the nanoclusters, therefore some ground-truth  
220 nanoclusters might have molecular densities too sparse to discern as clusters. Thirdly, multiple localization  
221 of single molecules, which our simulations included, causes individual molecules to manifest as small clusters  
222 of localizations. This increases spurious detection of small clusters among randomly distributed molecules.

223 Although StormGraph tests for and subsequently excludes clusters that cannot be confidently distinguished  
224 from multiply localized individual molecules, as described in the Methods, chance instances of two such  
225 molecules occurring close together would not be excluded. ClusterViSu and DBSCAN perform no such tests  
226 at all, and Figures 2 and S5b show that, for the same minimum cluster size of 5 localizations, StormGraph  
227 detects fewer spurious clusters than either. This is not the only reason for StormGraph having the best  
228 test results, however, as StormGraph still outperformed ClusterViSu and DBSCAN for simulated data in  
229 which every molecule yields exactly one localization (Figure S6). Overall, although clustering results from  
230 all algorithms inevitably deviated from ground-truth, StormGraph generally deviated the least.

231 Notably, StormGraph’s single-level clustering results, to which our reported performance statistics re-  
232 late, sometimes displayed merging or fragmentation of ambiguous ground-truth clusters. In such instances,  
233 clusters closer to ground truth were usually still visually evident in some level of the cluster hierarchy. An  
234 example of this is demonstrated in Figure 2c (Levels 1–4). Furthermore, for simulated data with nanoclusters  
235 of 50 nm radius, we were able to manually identify a level of clustering from StormGraph’s multi-level out-  
236 put that accurately recovered the ground-truth nanoclusters that composed larger ground-truth aggregations  
237 (Figure S7). Thus, StormGraph is able to identify meaningful clusters at multiple scales.

238 We also compared StormGraph to the Bayesian method of Rubin-Delanchy et al. (29), the only existing  
239 algorithm that fully utilizes localization uncertainties. However, we could not test the Bayesian method on  
240 the ROIs used in Figure 2, which typically contained between  $10^4$  and  $10^5$  localizations, due to excessive  
241 memory demands. Therefore, we simulated 30 new ROIs of size  $1\ \mu\text{m} \times 1\ \mu\text{m}$  containing fewer than  $10^4$   
242 localizations (see Figure 3b for two examples). The Bayesian method requires several user inputs, which are  
243 fully described by Rubin-Delanchy et al. We used the default prior distribution of cluster radii because this  
244 covered the expected range of possible cluster sizes in our simulations. For the generation of cluster proposals,  
245 we used the default range and increment of values of the threshold  $T$  (5 to 500 in increments of 5) and values  
246 from 5 nm to 210 nm in increments of 5 nm for the radius  $R$ . For the Dirichlet concentration parameter  $\alpha$   
247 and the prior probability,  $p$ , of localizations being non-clustered, we started with the default values (20 and  
248 0.5 respectively) and then adjusted them in an attempt to achieve better clustering results. For StormGraph,  
249 we again tested both the heuristic method and the kNN method, for which we varied  $k$  from 10 to 20, to  
250 automatically determine  $r_0$ . We also tested different values of StormGraph’s per-localization significance  
251 parameter  $\alpha$ . Because the Bayesian method does not require a minimum cluster size, we discarded the  
252 MinCluSize parameter from StormGraph, in which case it defaults to 3, the smallest number of points that  
253 can physically constitute a “cluster”. Thus, we operated StormGraph with just one or two input parameters.

254 By evaluating NMI, mean F-measure, and cluster quantification errors, we found that StormGraph was  
255 more robust than the Bayesian method (Figures 3a and S8). Importantly, the Bayesian method parameter  
256 values that produced the best results on average also produced extremely poor results for some ROIs that  
257 contained greater proportions of non-clustered molecules (Figures 3 and S8). The third column of Figure  
258 3b(ii) shows a clear example of this. We were able to improve the results of the Bayesian method for  
259 those ROIs by adjusting parameters, but this decreased the quality of results for other ROIs. None of the  
260 tested parameter values enabled the Bayesian method to perform as well as StormGraph overall for the  
261 entire set of 30 ROIs. Even for the overall best choices of parameter values, the Bayesian method always  
262 yielded substantial quantification errors for some ROIs, whereas the parameter values that we generally  
263 recommend for StormGraph ( $\alpha = 0.05$ ,  $k = 15$ ) always produced relatively reliable quantification (Figure  
264 3c-d). The worst results returned by StormGraph occurred when analyzing ROIs with relatively high  
265 densities of non-clustered molecules using the heuristic method for setting  $r_0$  coupled with a stringent per-  
266 localization significance value ( $\alpha = 0.01$ ). This is unsurprising because the heuristic method is not intended  
267 for situations with large numbers of non-clustered molecules and a stringent value of  $\alpha$ , by definition, increases  
268 the probability of false negatives. Even so, these settings still gave results that were comparable to the best  
269 results of the Bayesian method for most ROIs. Together, our tests indicate that StormGraph is more suitable  
270 for analyzing multiple diverse ROIs than the Bayesian method.

271 Furthermore, we found that StormGraph was 100 to 1,000 times faster than the Bayesian method at  
272 clustering each of the 30 simulated  $1 \mu\text{m} \times 1 \mu\text{m}$  ROIs (Figure 3e). Extrapolation of the computation times  
273 suggests that the Bayesian method could take  $\sim 12$  hours (ignoring memory constraints) to analyze a single  
274 ROI containing  $\sim 30,000$  localizations on a standard desktop computer, whereas StormGraph could analyze  
275 an entire experiment consisting of 30 such ROIs from each of two conditions or cell types (60 ROIs in total)  
276 in under 2 hours. For reference, in our lab, a typical dSTORM analysis of BCR clustering involves analyzing  
277 one ROI per B cell from  $> 20$  cells per condition, and each ROI usually contains between  $10^4$  and  $10^5$   
278 (average  $\sim 30,000$ ) localizations. Significantly, the long computation time of the Bayesian method prevents  
279 adequate tuning of its various parameters. All things considered, StormGraph may be more practical than  
280 the Bayesian method for analyzing SMLM data.

281 Finally, using simulated circular clusters, we compared StormGraph to the H-function, which is derived  
282 from Ripley's K-function (22) and often used to summarize clustering in SMLM data (e.g. (2)). Ripley's  
283  $K(r)$  function measures the average number of points, normalized by global density, within a disk of radius  
284  $r$  centered on a point in the data. The L-function square-root normalizes  $K(r)$  so that its expected value is

285  $r$  for a uniformly random distribution of points, and  $H(r)$  further subtracts  $r$  so that its expected value is  
286 zero. Significant deviation of  $H(r)$  above zero indicates clustering, and the value of  $r$  at which  $H(r)$  achieves  
287 its peak is often taken to indicate the size of clusters. In our tests, the H-function was biased towards  
288 the clusters containing the most points, as is mathematically expected, and, unlike StormGraph, it did not  
289 provide an accurate measure of cluster radius (Figure S9).

## 290 **StormGraph is robust to changes in global density of SMLM localizations**

291 Because the global density of SMLM localizations can vary between ROIs, batch processing cluster analysis of  
292 multiple ROIs, and comparison of results across samples, is only appropriate if the algorithm results are not  
293 influenced by the global localization density. This represents a fundamental limitation of the commonly used  
294 DBSCAN algorithm, whose user input parameters explicitly define a threshold density that does not adapt  
295 to the data. Our tests in Figures 2, S4, S5, and S6 using simulated ROIs spanning a range of localization  
296 densities highlighted this and conversely showed that StormGraph is robust to heterogeneity between ROIs.  
297 We further showed that StormGraph is robust specifically to global localization density by applying it to  
298 a dSTORM ROI, which contained heterogeneous clusters of immunoglobulin M (IgM)-isotype BCRs on  
299 the surface of an HBL-1 B cell (see later for details of experiment), after randomly removing 0%, 25%,  
300 50% or 75% of the localizations (Figure 4a). Although small, low-density clusters were eventually lost, the  
301 identification and area quantification of large, unambiguous clusters was robust, and the overall distribution  
302 of cluster areas was not significantly impacted ( $p > 0.05$ ; Figure 4b).

303 We also tested StormGraph's sensitivity to random noise by artificially adding random localizations (with  
304 uncertainties) to the unadulterated dSTORM ROI in Figure 4 (Figure S10). StormGraph's ability to detect  
305 all but small, low-density clusters was again robust, and its overall sensitivity to random noise was minimized  
306 by including localization uncertainties and using the kNN method to determine  $r_0$ . This implementation  
307 with  $k = 15$  resulted in no statistically significant ( $p < 0.05$ ) change in the distribution of cluster areas until  
308 the ratio of true localizations to artificial localizations was  $< 2$ .

## 309 **Quantification of heterogeneous B-cell receptor clustering from 2D dSTORM** 310 **data using StormGraph**

311 To test StormGraph on real SMLM data, we used it to analyze the clustering of IgM-BCRs on the cell  
312 membranes of B lymphocytes. Previous studies found that IgM-BCRs on resting B cells exist in preformed  
313 nanoclusters (2; 40). Treatment of resting B cells with anti-Ig antibodies, which are widely used as surrogates

314 for antigens to trigger B-cell activation, alters the spatial arrangement of BCRs, but the exact nature of  
315 the alterations remains controversial (2; 40; 41). Formation of larger BCR clusters has been observed upon  
316 anti-Ig treatment of resting B cells (2), suggesting a role for increased BCR clustering in the activation of  
317 B cells by antigens. Conversely, Reth and colleagues have proposed a model in which the initial step in  
318 BCR activation is the dissociation of autoinhibited BCR oligomers, and they observe a decrease in BCR  
319 nanocluster size after exposing B cells to antigens or to anti-Ig antibodies (40). Here, we provide new insights  
320 revealed by dSTORM and StormGraph, which suggest that the two models might not be mutually exclusive.

321 Using dSTORM, we imaged fluorescently labeled IgM-BCRs on *ex vivo* murine splenic B cells that  
322 were either resting or treated with bivalent antibodies against the BCR's Ig $\kappa$  light chain. Localization  
323 coordinates and their associated uncertainties were computationally determined from the fluorescence data.  
324 We then used StormGraph ( $\alpha = 0.05$ , MinCluSize = 5 localizations) to batch process the analysis of IgM-  
325 BCR clustering in  $\geq 24$  rectangular ROIs  $> 1 \mu\text{m}^2$  from separate cells and entirely within cell boundaries  
326 (Figure 5a). StormGraph automatically discounted any clusters of localizations that could not be confidently  
327 distinguished from overcounted single molecules. Using  $k = 15$ , StormGraph's single-level clustering results  
328 showed that the mean area of IgM-BCR clusters was significantly larger on anti-Ig $\kappa$ -treated B cells than  
329 on resting B cells (Figure 5b(i),  $p < 10^{-5}$ ), consistent with the "increased BCR clustering" model of BCR  
330 activation. However, we did not observe a uniform increase in the distribution of cluster areas. Instead,  
331 the difference was mainly due to a distributional shift towards larger areas of the clusters that were already  
332  $> 6 \times 10^3 \text{ nm}^2$ , which accounted for approximately the 20% largest clusters in both resting and anti-Ig $\kappa$ -  
333 treated cells (Figure 5b(ii)). The majority of clusters present on anti-Ig $\kappa$ -treated cells were, in fact, small  
334 multimers that were comparable to, or even smaller than, the IgM-BCR clusters on resting cells, a prediction  
335 of Reth's dissociation-activation model of BCR activation. The automatic (no  $k$  value) implementation of  
336 StormGraph yielded similar conclusions (Figure S11). Our observations here, powered by StormGraph's  
337 ability to analyze heterogeneous clustering in many ROIs, suggest that the two different models of antigen-  
338 induced BCR rearrangement coexist in the same cells. Antigen-induced BCR activation might be associated  
339 with both the dissociation of small oligomers and the aggregation of larger nanoclusters.

340 We next used StormGraph to analyze the aberrant spatial arrangement of IgM-BCRs on B-lymphoma cells  
341 with an activated B-cell like (ABC) phenotype. Davis et al. showed that chronic BCR signaling is a feature  
342 of many ABC-subtype diffuse large B-cell lymphomas (DLBCLs) and, using diffraction-limited microscopy,  
343 they observed large IgM-BCR clusters in the absence of any stimulus on the ABC DLBCL cell lines HBL-1  
344 and TMD8 but not on the Burkitt's lymphoma cell line BJAB (42). To better characterize aberrant IgM-

345 BCR clustering in some ABC DLBCLs, we used dSTORM and StormGraph to assess IgM-BCR cluster areas  
346 from  $\geq 33$  ROIs  $> 1 \mu\text{m}^2$  on HBL-1, TMD8, and BJAB cells (Figure 5c). ROIs contained between  $5 \times 10^3$   
347 and  $3 \times 10^5$  localizations. Using  $k = 15$ , StormGraph revealed that the mean areas of IgM-BCR clusters on  
348 HBL-1 and TMD8 cells were significantly larger than on BJAB cells ( $p < 10^{-4}$  and  $p < 10^{-14}$  respectively;  
349 Figure 5d(i)). The difference between the distributions of IgM-BCR cluster areas on BJAB and HBL-1 cells  
350 resembled the difference between resting and anti-Ig $\kappa$ -treated B cells. Although HBL-1 and BJAB cells both  
351 had many small IgM-BCR clusters, the HBL-1 ABC DLBCL cells displayed greater size and/or frequency of  
352 large clusters  $> 10^4 \text{ nm}^2$ . In contrast, the other ABC DLBCL cell line, TMD8, displayed an overall upward  
353 shift in the distribution of cluster areas compared to BJAB, though  $> 80\%$  of IgM-BCR clusters on the TMD8  
354 cells still had areas  $< 10^4 \text{ nm}^2$  (Figure 5d(ii)). The automatic implementation of StormGraph yielded similar  
355 results (Figure S11). Also, although it reduced the magnitude and statistical significance of some of the  
356 differences in cluster areas reported by the automatic implementation of StormGraph, ignoring localization  
357 uncertainties during StormGraph analysis of our anti-Ig $\kappa$  and B-lymphoma dSTORM experiments did not  
358 qualitatively alter results (Figure S11). All together, our observations reveal that IgM-BCRs exist in a  
359 heterogeneous combination of small and large clusters in two ABC DLBCL cell lines and that their increased  
360 frequencies of large IgM-BCR clusters mimic observations for B cells activated by anti-Ig antibodies. This  
361 supports findings by Davis et al. (42) that those ABC DLBCL cell lines exhibit chronic BCR signaling.

## 362 Computation time

363 To investigate the time complexity of StormGraph, we timed StormGraph clustering for each of the dSTORM  
364 ROIs that we analyzed in Figure 5 and plotted the computation times against the total number of localizations  
365 per ROI (Figure 6a). Neither the choice of method (kNN or automatic) to determine  $r_0$  nor whether or not  
366 localization uncertainties were utilized substantially influenced the computation time. For StormGraph  
367 utilizing uncertainties with  $k = 15$  and  $\alpha = 0.05$ , we empirically determined that the computation time,  $T$ ,  
368 taken by StormGraph for one ROI containing  $N$  localizations from our IgM-BCR dSTORM data could be  
369 estimated by  $T = 1.3 \times 10^{-4} \times N^{1.32}$  seconds (Figure 6b). The theoretical time complexity of StormGraph  
370 is difficult to determine because it depends on many factors, but this empirical relationship indicates a  
371 time complexity of approximately  $\mathcal{O}(N^{1.32})$ . The empirical relationship between  $N$  and  $T$  translates to  
372 computation times per ROI of  $< 1$  minute for  $10^4$  localizations,  $\sim 10$  minutes for  $10^5$  localizations, and  
373  $\sim 3$  hours for  $10^6$  localizations. The cumulative time taken by any of the four tested implementations of  
374 StormGraph to analyze all 167 ROIs from our two IgM-BCR dSTORM experiments was under 12 hours.

375 Hence, StormGraph is particularly well suited for analyzing receptor clustering on B and T cells, where an  
376 SMLM ROI that occupies a large fraction of the area of a cell would typically contain on the order of  $10^4$  or  
377  $10^5$  localizations.

## 378 **Two-color analysis of cluster overlap**

379 Co-aggregation and segregation of different molecules are important cellular mechanisms for regulating signal  
380 transduction and can be studied via multi-color SMLM. To quantify colocalization of clusters of molecules  
381 labeled by two different colors (e.g. red and blue), the StormGraph software quantifies the total area of  
382 overlap divided by each of the following: (1) total red cluster area; (2) total blue cluster area; and (3) total  
383 area covered by clusters of either color, yielding the Jaccard index (43) (Figure 7). The software also reports  
384 analogous quantities using numbers of localizations instead of areas (not shown). To estimate the maximal  
385 experimentally observable colocalization, colocalization analysis should first be applied to the same molecular  
386 species labeled with two different probes. This rarely yields 100% colocalization for several reasons, including  
387 differing affinities of antibody-fluorophore conjugates, differing photophysical properties of fluorophores, and  
388 the inability of two probes to occupy the same binding site.

389 To demonstrate cluster overlap analysis by StormGraph, we performed such a positive control experiment  
390 by simultaneously labeling cell-surface IgG-BCRs on murine A20 B cells with anti-IgG antibodies conjugated  
391 to either Alexa Fluor 647 (AF647) or Cy3B fluorophores. These antibodies were bivalent, thus inducing  
392 formation of large clusters prior to cell fixation. Both color channels were imaged using dSTORM and  
393 aligned using custom MATLAB code to correct for chromatic aberrations. We then analyzed multiple ROIs  
394 using StormGraph (Figure 7). On average, we found 79% overlap of the IgG-AF647 clusters with the IgG-  
395 Cy3B clusters and 66% overlap of the IgG-Cy3B clusters with the IgG-AF647 clusters (Figure 7e). This  
396 difference is likely due to differing qualities of the AF647- and Cy3B-conjugated antibodies. The Jaccard  
397 index cannot exceed either one-sided overlap score, and we obtained an average Jaccard index of 0.5. In a  
398 similar experiment staining tubulin, Andronov et al. obtained  $\sim 40\%$  overlap of each probe with the other  
399 using ClusterViSu (25). This shows that StormGraph performs well as part of a pipeline for analyzing cluster  
400 colocalization by SMLM.

## 401 **Clustering in three dimensions**

402 To extend a clustering algorithm to 3D SMLM data, two challenges must be addressed. First, most 3D  
403 SMLM techniques achieve lower axial resolution than lateral resolution. However, StormGraph implicitly



404 assumes that all dimensions should be weighted equally during graph construction. Therefore, StormGraph  
405 pre-processes 3D data for cluster identification, but not subsequent quantification, by rescaling the axial ( $z$ )  
406 dimension so that average axial and lateral positional uncertainties, when known, become equal. Second,  
407 3D SMLM localizations are often concentrated around a focal plane, causing their axial distribution to be  
408 nonuniform. To account for this, StormGraph now uses the parameter  $\alpha$  to obtain a  $z$ -dependent node-degree  
409 threshold from random point clouds with normally distributed  $z$ -coordinates (Methods). For situations with  
410 localizations distributed uniformly in  $z$ , StormGraph still retains the option to use a constant threshold  
411 instead. On the other hand, DBSCAN is unable to adapt to axial variation in localization density.

412 We compared the performances of StormGraph and DBSCAN in 3D (“StormGraph-3D” and “DBSCAN-  
413 3D”) using simulated 3D data. As in 2D, we found that, overall, the output clusters were closer to ground  
414 truth for StormGraph than DBSCAN regardless of parameter choices (Figure S12). We also performed  
415 2D clustering (“StormGraph-2D” and “DBSCAN-2D”) of the  $xy$ -projections of our simulated 3D data.  
416 Including the  $z$ -component of 3D data generally improves clustering accuracy because localizations and  
417 clusters that are separated only in  $z$  are inseparable in the  $xy$ -projection. StormGraph-3D produced the  
418 best overall clustering results, but even StormGraph-2D produced better results than both DBSCAN-3D and  
419 DBSCAN-2D. Moreover, these results were obtained using the same parameter values for both StormGraph-  
420 3D and StormGraph-2D, whereas DBSCAN-3D and DBSCAN-2D necessitated different parameter values,  
421 as expected. Hence, it is easy to switch between 2D and 3D analyses with StormGraph.

422 To illustrate StormGraph’s application to real 3D SMLM data, we used dSTORM to image intracellular  
423 lysosomal-associated membrane protein 1 (LAMP-1). We simultaneously immunostained LAMP-1 in B16  
424 melanoma cells with two different labels, AF647 and Cy3B, and applied StormGraph ( $k = 15$ ,  $\alpha = 0.1$ ,  
425  $\text{MinCluSize} = 5$  localizations) to a 3D ROI with axial variation in localization density and known localization  
426 uncertainties (Figure 8a–b). StormGraph detected 363 LAMP-1 AF647 clusters and 129 LAMP-1 Cy3B  
427 clusters (Figure 8c–d). The AF647 clusters had volumes ranging from  $1.5 \times 10^3 \text{ nm}^3$  to  $7.1 \times 10^7 \text{ nm}^3$  with a  
428 median of  $3.5 \times 10^5 \text{ nm}^3$ , and Cy3B clusters had volumes ranging from  $3.1 \times 10^3 \text{ nm}^3$  to  $3.7 \times 10^7 \text{ nm}^3$  with  
429 a median of  $9.0 \times 10^5 \text{ nm}^3$  (Figure 8e). The discrepancy in cluster volumes was likely caused by variance in  
430 labeling or probe detection. Indeed, we detected almost four times as many AF647 localizations as Cy3B  
431 localizations ( $9.0 \times 10^4$  versus  $2.5 \times 10^4$ ) and it is evident from Figure 8a–b that Cy3B was inadequate for  
432 some of the features observed using AF647. This shows that probe choice is an important consideration for  
433 SMLM. Nevertheless, StormGraph detected similar larger-volume clusters in both color channels provided  
434 that they were sufficiently labeled by both probes.



435        Additionally, we computed volumetric 3D overlap between AF647 clusters and Cy3B clusters (Figure 8f–  
436 g). Though only 31% of the total AF647 cluster volume overlapped with Cy3B clusters, we found that 50%  
437 of the total Cy3B cluster volume overlapped with AF647 clusters. The Jaccard index (which cannot exceed  
438 the smaller overlap score, i.e. 0.31) was 0.24. These observations were probably explained by weaker labeling  
439 or detection with Cy3B than AF647 such that some clusters lacked Cy3B signal. To our knowledge, our  
440 software is the first to compute volumetric overlap for two-color, 3D SMLM data. StormGraph thus offers  
441 an alternative to Coloc-Tesseler (44), an extension of SR-Tesseler, for analysis of co-clustering of molecules.  
442 Our results for LAMP-1 show that StormGraph can identify and quantify clusters of localizations in 3D  
443 SMLM ROIs and, furthermore, that it can detect and quantify overlap between 3D clusters in two-color  
444 data.

## 445 Discussion

446 By converting 2D or 3D SMLM data into a neighborhood graph, StormGraph leverages concepts from graph  
447 theory, especially community detection, to assign localizations to clusters at multiple scales. StormGraph  
448 can be downloaded from [URL to be inserted upon acceptance for publication] and is run in MATLAB using  
449 either a script or a simple graphical user interface (GUI). The software automatically quantifies clusters at  
450 an automatically selected scale, quantifies cluster overlap for two-colour SMLM data, and includes MATLAB  
451 functions for data visualization in 2D or 3D. Through extensive testing using simulated data, we showed  
452 that StormGraph is generally more accurate than existing cluster analysis methods. Furthermore, unlike  
453 the popular DBSCAN (23) and methods based on Voronoi diagrams (24; 25), StormGraph can utilize the  
454 uncertainties in individual localization positions to enhance clustering accuracy. Previously, only a Bayesian  
455 method (29; 30) had this capability, but StormGraph requires fewer user inputs, makes fewer assumptions,  
456 and is between 100 and 1,000 times faster. As summarized in Table S1, StormGraph combines several  
457 features that are not all available simultaneously in any other SMLM cluster analysis method.

458 A crucial feature of StormGraph is its automatic determination of scale-dependent thresholds from scale-  
459 independent input parameters, whose selection we provide guidelines for in the Methods. Firstly, StormGraph  
460 determines a neighborhood radius either based on a user-specified number of neighbors,  $k$ , that neighbor-  
461 hoods of clustered localizations should exceed (recommended method) or heuristically without user input  
462 (suitable for data in which at least two thirds of the localizations clearly belong to clusters). Secondly, Storm-  
463 Graph decides which localizations are sufficiently dense to be clustered via a user-specified per-localization  
464 significance level  $\alpha$ . Hence, StormGraph's input parameters —  $k$  (optional) and  $\alpha$  (required) — do not  
465 require any *a priori* knowledge about quantities that often vary between ROIs in SMLM experiments, such  
466 as the localization density, which affects DBSCAN, or the fraction of localizations that do not belong to  
467 clusters, which affects the Bayesian method. Consequently and importantly, StormGraph enables unbiased  
468 analysis of disparate datasets using identical parameter values, whereas DBSCAN and the Bayesian method  
469 do not. Therefore, StormGraph is more suitable than either DBSCAN or the Bayesian method for analyz-  
470 ing SMLM datasets consisting of multiple ROIs and for making comparisons between different conditions,  
471 molecules, or cell types.

472 By applying StormGraph to actual dSTORM data, we simultaneously detected both very small and very  
473 large IgM-BCR clusters on the cell membranes of activated B cells. Two opposing models of antigen-induced  
474 BCR activation have been proposed by others: one model involves increased aggregation of BCRs and the  
475 other involves a decrease in BCR clustering via dissociation. Our observations, quantified by StormGraph,

476 permit a new hypothesis that both models occur together. Perhaps large clusters form from BCRs that must  
477 first dissociate from pre-existing small clusters. This would unite the two opposing models for the first time  
478 and warrants further investigation. By providing improved quantitative characterization of heterogeneous  
479 receptor clustering, StormGraph should enable new insights into the relationship between receptor clustering  
480 and receptor signaling.

481 Note that we deliberately avoided making any statements about numbers of molecules during our analysis  
482 of experimental dSTORM data. In SMLM, the ratio of localizations to molecules is not one-to-one. Repeated  
483 blinking of fluorophores and labeling of individual molecules by multiple fluorophores cause overcounting of  
484 molecules. Spatially unresolvable fluorophores that blink simultaneously cannot be localized and therefore  
485 cause undercounting of molecules, which is especially an issue for dense clusters. Undercounting also arises  
486 from other experimental sources of error, such as incomplete labeling of molecules or incomplete detection of  
487 fluorophores. For well controlled PALM experiments with minimal undercounting, the number of molecules  
488 can be estimated (45; 46), but for general SMLM experiments, especially dSTORM using fluorescent im-  
489 munolabeling of molecules as we performed, accurate determination of the number of molecules per cluster  
490 remains a challenge. Therefore, to avoid false biological interpretation of the data, we chose to report only  
491 cluster areas or volumes.

492 During the development of StormGraph, Khater et al. also presented a method to analyze SMLM data  
493 using graphs (31). We note important differences between their approach and StormGraph. Both methods  
494 filter out non-clustered data points using a node-degree threshold obtained from random data, but whereas  
495 StormGraph obtains this threshold using a per-localization significance level  $\alpha$ , Khater et al. use a parameter  
496 equivalent to the  $\alpha$  parameter in SR-Tesseler. For clustering, StormGraph uses graph-based community  
497 detection whereas Khater et al. use the mean shift algorithm (47), an unrelated density estimation method,  
498 which is sensitive to a difficult-to-select user-specified bandwidth parameter (48). Khater et al. then use  
499 multi-threshold network analysis to identify modular structures within the clusters, whereas StormGraph  
500 identifies clusters and their multiple levels of constituent subclusters simultaneously using automated multi-  
501 level clustering. Finally, unlike StormGraph, the method of Khater et al. does not account for uncertainties  
502 in localization positions.

503 It should be noted that the uncertainties in localization positions, which result from the finite resolution of  
504 SMLM, cause the localization clusters to be larger than the true underlying molecular clusters. StormGraph  
505 does not correct for this, nor do any of the other clustering algorithms. Users should therefore be aware  
506 that the cluster areas or volumes reported by StormGraph will be slight overestimates of the actual sizes of

507 the molecular clusters. The quantified overlap of localization clusters will also differ slightly from the true  
508 overlap of molecular clusters. If the clusters output by StormGraph happen to be approximately Gaussian,  
509 then mathematical correction methods (49) could be applied in order to improve estimates of cluster size  
510 and overlap. Without any such correction, it is important to perform all imaging at the same resolution in  
511 order to keep errors consistent and enable fair comparisons. Nonetheless, StormGraph will advance cluster  
512 analysis in the SMLM field. Parameter selection is simple (we recommend  $k = 15$  and values of  $\alpha$  between  
513 0.01 and 0.1 for most data), and a simple MATLAB GUI and script make StormGraph accessible to a wide  
514 range of users. With its unique combination of features — including utilization of localization uncertainties  
515 and generation of nested clusters across multiple scales — and greater robustness and accuracy than existing  
516 algorithms, we believe that StormGraph provides a one-stop shop for SMLM cluster analysis.

## 517 **Methods**

### 518 **Calculation of the length scale $r_0$**

#### 519 **(1) The fully automatic, heuristic method**

520 To automatically determine a length scale  $r_0$  without user input, we implement a variation of the elbow  
521 method heuristic. For values of  $\varepsilon$  ranging from 0 to a sufficiently large value based on the optimal affinity  
522 scale stated by Arias-Castro (50), we construct the  $\varepsilon$ -neighborhood graph for the data. We then plot the  
523 number of connected components (including singletons) against  $\varepsilon$ . This must be monotonically decreasing  
524 and typically bears resemblance to a decaying exponential or logistic function. As  $\varepsilon$  increases, an “elbow”  
525 region occurs as rapid linking of nodes within clusters at small values of  $\varepsilon$  transitions to slower linking of  
526 distinct clusters and dispersed nodes at larger values of  $\varepsilon$ . Eventually all nodes would belong to a single  
527 connected component.

528 Sometimes, a natural number of clusters will be evident as a horizontal (i.e. constant) plateau occurring  
529 at  $> 1$  connected component in this plot. In such cases, we find the plateau corresponding to the largest fold  
530 increase in the area or volume of the  $\varepsilon$ -neighborhood. Let  $\varepsilon_1$  be the value of  $\varepsilon$  at the start of this plateau,  
531 and let  $\varepsilon_2 = 2^{1/d}\varepsilon_1$ , where  $d$  is the dimensionality of the data, be chosen such that the  $\varepsilon_2$ -neighborhood  
532 is twice the area or volume of the  $\varepsilon_1$ -neighborhood. If the  $\varepsilon_1$ - and  $\varepsilon_2$ -neighborhood graphs have the same  
533 number of connected components, then we set  $r_0 = \varepsilon_2$  (Figure S1).

534 Otherwise, we fit a curve  $f(\varepsilon)$  to the number of connected components versus  $\varepsilon$  (Figure S1). We choose  
535  $f(\varepsilon)$  to be the sum of a constant  $b$  and either one or two generalized logistic functions of the form

$$L(\varepsilon) = \frac{a}{(1 + \exp(s(\varepsilon - \varepsilon_0)))^{1/\nu}},$$

536 where  $b \geq 0$ ,  $a \geq 0$ ,  $s \geq 0$ ,  $\nu > 0$ , and  $\varepsilon_0$  are coefficients to be fit. To avoid overfitting, we only include  
537 the second logistic function if it yields a substantial improvement in the goodness of fit and we restrict its  
538 allowable values of  $\nu$ . The elbow of this curve is not mathematically well defined, but intuitively it is related  
539 to the concavity: the curve achieves maximum (positive) concavity as it approaches the elbow region, and  
540 then its concavity decreases as it traverses the elbow region. StormGraph chooses the length scale  $r_0$  to be  
541 towards the end of the elbow region as follows. Let  $\varepsilon_{\max}$  be the value of  $\varepsilon$  at which  $f''(\varepsilon)$ , the concavity  
542 of  $f(\varepsilon)$ , is maximized. StormGraph sets  $r_0$  to be the value of  $\varepsilon > \varepsilon_{\max}$  where  $f''(\varepsilon)$  first falls below 2% of  
543 its maximum value (Figure S1). We chose this 2% threshold empirically after experimenting with different

544 values. Since StormGraph generates a multi-level clustering, and since we have developed and implemented  
545 a method to return a single-level clustering based on the hierarchy of clusters, it is safer to overestimate than  
546 underestimate a suitable value for  $r_0$ . Erroneous merging of clusters can generally be resolved by moving  
547 to a finer level of the cluster hierarchy, but erroneous failure to merge clusters cannot be retroactively fixed  
548 using the hierarchy. Through experimentation, we found that a 2% threshold worked well while being a  
549 generally safe choice.

550 When localization uncertainties are available in the data, they are initially excluded when utilizing the  
551 elbow method to set the initial length scale  $r_0$ , which is used for classifying localizations as either clustered  
552 or unclustered. The uncertainties are subsequently taken into account during the final use of the elbow  
553 method, which sets the value of  $r_0$  that is used for construction of the final graph following elimination of  
554 unclustered localizations. Specifically, the graph in which we count the number of connected components for  
555 a given  $\varepsilon$  is constructed from Monte Carlo simulated realizations of the data with two nodes connected to  
556 each other by an edge if and only if they are within a distance  $\varepsilon$  of each other in at least 75% of the Monte  
557 Carlo simulations (see later in the Methods for details of Monte Carlo simulations and edge pruning). Note  
558 that edge weights are not relevant here because they do not affect the number of connected components.

## 559 (2) The kNN method

560 To determine the length scale  $r_0$  for a selected ROI using a  $k$ -nearest neighbors (kNN) approach, StormGraph  
561 first finds the distance of every point in the ROI to its  $k^{\text{th}}$  nearest neighbor. If localization uncertainties are  
562 available in the data, this is performed for 100 Monte Carlo simulated realizations of the data, and the 95%  
563 confidence level for the  $k^{\text{th}}$  nearest neighbor distance is obtained for every localization. The distribution  
564 of  $k^{\text{th}}$  nearest neighbor distances is also obtained for Monte Carlo simulations of random data with the  
565 same global average point density as the ROI. A histogram of  $k^{\text{th}}$  nearest neighbor distances should initially  
566 increase more rapidly for clustered data than for random data, but the histograms for clustered and random  
567 data will eventually intersect each other (Figure S1). Inspired by the automated version of ClusterViSu  
568 (25), StormGraph defines  $r_0$  as the distance at which these histograms of  $k^{\text{th}}$  nearest neighbor distances first  
569 intersect. Points closer than  $r_0$  to their  $k^{\text{th}}$  nearest neighbor are more likely to exist in clustered data, while  
570 points farther than  $r_0$  from their  $k^{\text{th}}$  nearest neighbor are more likely to exist in random data. Moreover,  
571 points in clusters will tend to have more than  $k$  neighbors within a distance  $r_0$ , while randomly distributed  
572 points will tend to have fewer than  $k$  neighbors within a distance  $r_0$ . However, if this first histogram  
573 intersection occurs after the median of the random data's histogram, this indicates that, on average, the real

574 data is actually more dispersed than the random data, and in this case StormGraph defines  $r_0$  simply as the  
575 median of the random data's  $k^{\text{th}}$  nearest neighbor distances.

## 576 **Simulating multiple data realizations and calculation of graph edge weights**

577 StormGraph uses Monte Carlo simulations to simulate multiple realizations of the data by resampling each  
578 localization's coordinates. The new  $x$ ,  $y$  and, if applicable,  $z$  coordinates for a particular localization are  
579 drawn independently from normal distributions centered at the original observed localization position. The  
580 standard deviations are equal to the corresponding uncertainties recorded in the data. StormGraph then  
581 determines the graph edge weights  $W_{ij} = \langle s_{ij} \rangle$  from the Monte Carlo simulations by calculating  $\langle s_{ij} \rangle$  to be  
582 the mean of the simulated values of  $s_{ij}$  for each specific node pair  $\{i, j\}$ .

## 583 **Thresholding of node degrees to eliminate unclustered nodes**

584 Setting  $\alpha = 1$  skips the thresholding step altogether, allowing all nodes to be considered for clustering.  
585 Otherwise, to set the node-degree threshold, StormGraph first constructs  $r_0$ -neighborhood graphs with edge  
586 weights  $s_{ij}$  for simulated random point clouds with the same global average point density as the SMLM data.  
587 For 2D data (and for 3D data with uniform axial acquisition), the random points are uniformly distributed  
588 in  $x$  and  $y$  (and  $z$ ). Then StormGraph sets the degree threshold as the  $((1 - \alpha) \times 100)^{\text{th}}$  percentile of  
589 the aggregated degree distribution of the random simulations. For 3D data with localizations concentrated  
590 around a focal plane, StormGraph simulates random data with  $z$ -coordinates that are distributed normally  
591 with the same interquartile range as the data. StormGraph then obtains a  $z$ -dependent node-degree threshold  
592 by fitting a Gaussian curve to node degree versus  $z$  for the simulated random points and finding the  $(1 -$   
593  $\alpha) \times 100\%$  confidence upper bound curve. Thus, for both 2D and 3D data, an expected  $\alpha \times 100\%$  of nodes  
594 in any of the random simulations would have degrees exceeding the threshold.

595 For actual data, because the edge weights are calculated by averaging  $s_{ij}$  over Monte Carlo simulations,  
596 the number of localizations that would be classified as clustered in random data would usually be less than  
597  $\alpha \times 100\%$ . Hence, this averaging using localization uncertainties reduces the detection of spurious, small  
598 clusters arising from random spatial fluctuations in density.

599 If localization uncertainties are not known, then we take a different approach to reduce detection of  
600 spurious clusters. Preliminary clusters are defined using a community detection algorithm. A node is then  
601 classified as unclustered if it meets any of the following four criteria: (1) it belongs to a preliminary cluster  
602 whose mean degree is below the threshold; (2) its own degree is below the threshold and is also a lower outlier

603 ( $< \text{lower quartile (LQ)} - 1.5 \times \text{interquartile range (IQR)}$ ) for its preliminary cluster; (3) its own degree passes  
604 the threshold but is a strong lower outlier ( $< \text{LQ} - 3 \times \text{IQR}$ ) for its preliminary cluster; (4) its own degree  
605 is less than half of the threshold. The first criterion provides robustness by spatially averaging node degrees  
606 over small areas. This prevents the inclusion of spurious, small clusters. The other three criteria prevent the  
607 inclusion of nodes that are visually separate from a cluster but still within a distance  $r_0$  of one.

608 To avoid biases arising from the choice of algorithm used for the preliminary clustering, StormGraph  
609 performs this twice, independently, using two different community detection algorithms, and it then classifies  
610 nodes as unclustered if either method does. The two algorithms used are the two-level version of Infomap  
611 (51) and the Louvain method (52), which are two of the top performing community detection algorithms (33).  
612 Infomap is an information theoretic algorithm based on flow on the graph, while the Louvain method is one  
613 of several algorithms that aims to maximize a property of the graph called “modularity”. See Supplementary  
614 Note 1 for further technical details.

## 615 **Edge pruning**

616 When localization uncertainties are used in the StormGraph algorithm, we prune edges from the final graph  
617 that is constructed from only the nodes that are retained after thresholding node degrees. To do this, we  
618 delete every edge that has nonzero  $s_{ij}$  in fewer than 75% of the Monte Carlo simulations that were used to  
619 calculate the edge weights. This guarantees that any pair of retained edges have at least an estimated 50%  
620 probability of co-occurring in the  $r_0$ -neighborhood graph for any realization of the data, and the unknown true  
621 localization positions is one possible realization. This prevents the linking of clusters that are disconnected  
622 in most realizations of the  $r_0$ -neighborhood graph but connected in the average graph, since linking of two  
623 clusters requires at least one node to be connected by edges to nodes in both clusters simultaneously. After  
624 pruning, two clusters can only be linked if they are connected in at least half of the Monte Carlo simulations.

## 625 **Merging clusters at the top of the multi-level Infomap hierarchy**

626 To facilitate the identification and quantification of particularly large clusters, StormGraph creates an ad-  
627 ditional level at the top of the multi-level Infomap cluster hierarchy, if possible, by merging sufficiently  
628 interconnected clusters. It is natural to consider the connected components of a graph to be the clusters  
629 at the coarsest level of a cluster hierarchy. We therefore use this concept to define the top level of Storm-  
630 Graph’s cluster hierarchy by merging Infomap clusters that form connected components. However, due to the  
631 uncertainties in SMLM data, StormGraph only merges clusters if they form stable connected components,



632 which we define as connected components that would remain connected following the random removal or  
633 displacement of any one node. Oftentimes, this step results in no merging of clusters and so no additional  
634 level of clustering is created.

### 635 **Algorithm to obtain single-level clustering from cluster hierarchy**

636 Although various methods exist to select one level from a cluster hierarchy, for example silhouette scores  
637 (53) and the gap statistic (54), existing methods are either very computationally intensive or otherwise  
638 incompatible with StormGraph. We therefore developed our own fast algorithm to obtain a single-level  
639 clustering from the cluster hierarchy output by StormGraph, which we describe here.

640 The multi-level clustering output by StormGraph is generated from an  $r_0$ -neighborhood graph. An  
641 alternative type of graph commonly used for clustering problems is the symmetric  $k$ -nearest neighbor (kNN)  
642 graph, in which two nodes are connected by an edge if either of them is among the  $k$  nearest neighbors of  
643 the other. A related graph is the mutual kNN graph, a subgraph of the symmetric kNN graph, in which two  
644 nodes are connected by an edge if and only if each node is among the  $k$  nearest neighbors of the other. One  
645 simple clustering algorithm would be to identify the connected components in a symmetric kNN graph or in  
646 a mutual kNN graph, where  $k$  is an adjustable parameter.

647 In a symmetric kNN graph, it is guaranteed that every node has at least  $k$  edges. However, as  $k$  increases,  
648 nodes in low-density regions between two distinct clusters quickly become connected to both clusters, while  
649 the high-density regions inside the clusters may remain fragmented into multiple connected components  
650 until higher values of  $k$ . A mutual kNN graph, in which every node is guaranteed to have at most  $k$   
651 edges, more faithfully represents such clusters by preventing nodes in low-density regions from making too  
652 many connections. However, mutual kNN graphs often suffer from having singletons and small connected  
653 components due to the weak connectivity. We therefore chose to combine the concepts of both the symmetric  
654 kNN and mutual kNN graphs.

655 For a set of points  $V$  and positive integers  $M$  and  $K > M$ , we define  $G_{M,K}(V)$  to be the union of the  
656 symmetric  $M$ NN graph and the mutual  $K$ NN graph for vertices  $V$ . This is still a subgraph of the symmetric  
657  $K$ NN graph, but it has stronger connectivity than the mutual  $K$ NN graph by guaranteeing that every node  
658 has at least  $M$  edges, which in turn ensures that  $G_{M,K}(V)$  contains no connected components with fewer  
659 than  $(M + 1)$  nodes.

660 For each cluster at the top level of the cluster hierarchy, StormGraph decides whether to split the cluster  
661 into its subclusters at the next level down in the hierarchy according to the algorithm described below. If

662 the split is rejected, then StormGraph keeps the current cluster and does not examine any of the finer levels  
663 of the hierarchy within that cluster. If the split is accepted, then this process is repeated recursively for  
664 each of the newly accepted subclusters. A split is automatically rejected if more than 1% of the points in  
665 the cluster belong to subclusters with fewer than the minimum number of points, specified by the user, that  
666 constitute a cluster.

667 Let  $V$  be the set of nodes in a cluster  $C$ , let  $A = \{C_1, C_2, \dots, C_n\}$  be the set of  $n$  subclusters of  $C$  at  
668 the next finest level of the cluster hierarchy, and let  $B(M, K) = \{C'_1, C'_2, \dots, C'_{n'}\}$  be the set of  $n'$  connected  
669 components of the graph  $G_{M,K}(V)$ . StormGraph decides whether to split cluster  $C$  into its constituent  
670 subclusters  $A$  using the following algorithm:

- 671 1. Construct  $G_{2,K}(V)$  for all integers  $K \in \{6, \dots, K_1\}$ , where  $K_1$  is the smallest integer such that  
672  $G_{2,K_1}(V)$  is connected. We empirically chose the minimum value of  $K$  to be 6 because this usually  
673 results in randomly distributed points forming a single connected component.
- 674 2. Find the value of  $K$  for which  $B(2, K)$  is most similar to  $A$  according to some measure of similarity.  
675 Denote this value of  $K$  by  $K^*$ .
- 676 3. Split cluster  $C$  into subclusters  $A$  if the similarity between  $A$  and  $B(2, K^*)$  is greater than both a  
677 threshold similarity and the similarity between  $C$  and  $B(2, K^*)$ .

678 The most obvious choices for a similarity measure to score the similarity between two clusterings of the  
679 nodes  $V$  are normalized mutual information (NMI) (38) and mean F-measure (39). We require a similarity  
680 measure that is defined even if one of the clusterings being compared consists of only a single cluster. This  
681 eliminates NMI as a suitable choice, so we use mean F-measure.

682 Let  $F(A, B)$  denote the similarity of clustering  $A$  to clustering  $B$  as measured by the mean F-measure.  
683 The F-measure or  $F_1$  score for a binary classification problem in which a cluster  $C_i$  is compared to a reference  
684 cluster  $C'_i$  (usually the ground-truth cluster that the cluster  $C_i$ , found by a clustering algorithm, is supposed  
685 to recover) is defined as the harmonic mean of precision ( $P$ ) and recall ( $R$ ):

$$F_1(C_i, C'_i) = \frac{2 \cdot P(C_i, C'_i) \cdot R(C_i, C'_i)}{P(C_i, C'_i) + R(C_i, C'_i)}.$$

686 The precision  $P(C_i, C'_i)$  is the fraction of  $C_i$  that belongs to  $C'_i$ , and the recall  $R(C_i, C'_i)$  is the fraction of  
687  $C'_i$  that belongs to  $C_i$ . The mean F-measure  $F(A, B)$  is then defined as the weighted arithmetic mean of the

688 maximum F-measures for each of the clusters  $C'_i$  in  $B$ :

$$F(A, B) = \frac{\sum_{i=1}^{n'} |C'_i| \max_{1 \leq j \leq n} \{F_1(C_j, C'_i)\}}{\sum_{i=1}^{n'} |C'_i|},$$

689 where  $|C'_i|$  denotes the number of points in  $C'_i$ .

690 The mean F-measure is not symmetric, i.e.  $F(A, B) \neq F(B, A)$ , which is not desirable in our situation  
691 where we wish to compare two clusterings, neither of which is necessarily ground-truth. To avoid having  
692 to choose one of the clusterings  $A$  and  $B$  to be the reference, we define a symmetric similarity measure,  
693  $\bar{F}(A, B)$ , as the arithmetic mean of  $F(A, B)$  and  $F(B, A)$ :

$$\bar{F}(A, B) = \frac{1}{2} (F(A, B) + F(B, A)).$$

694 This is the similarity measure that we use in our algorithm for obtaining a single-level clustering from the  
695 hierarchy. It ranges from 0 to 1, and  $\bar{F}(A, B) = 1$  if and only if  $A$  and  $B$  are identical. We impose a minimum  
696 similarity score of  $\bar{F}_{\min} = 0.8$  for a cluster split to be considered. Thus, we split cluster  $C$  into its highest  
697 level of subclusters,  $A$ , if  $A$  is at least 80% similar to  $B(M, K^*)$  and is also a closer match to  $B(M, K^*)$  than  
698 the single, unified cluster  $C$  is. The 80% similarity threshold prevents the fragmentation of a cluster if there  
699 is not substantial consensus between the two independent subclusterings. This threshold could be tuned to  
700 make it more or less difficult to split a cluster into finer levels of subclusters. In particular, a threshold of  
701  $\bar{F}_{\min} = 1$  would demand perfect agreement between the subclusters of  $C$  and the alternative, independent  
702 clustering  $B(M, K^*)$  for the subclusters to be accepted as a better clustering of  $V$  than a single cluster. We  
703 chose a threshold of 0.8 to allow some leniency.

## 704 **Identifying clusters that can be confidently distinguished from multiply counted** 705 **single molecules**

706 Localizations arising from multiply counted single molecules may be falsely identified as clusters. As an  
707 optional step during StormGraph analysis, clusters of localizations that cannot be distinguished with high  
708 confidence, due to their positional uncertainties, from multiply counted single molecules can be identified  
709 and subsequently reclassified as unclustered (cluster label 0). To do this, StormGraph checks each cluster  
710 systematically as follows.

711 First, for each pair of localizations,  $\mathbf{X}^i = (x^i, y^i, z^i)$  and  $\mathbf{X}^j = (x^j, y^j, z^j)$ , in the cluster, let  $\mathbf{Y}^{ij} = \mathbf{X}^i - \mathbf{X}^j$

712 be their vector difference, and let  $\Sigma^{ij}$  be the covariance matrix for the coordinates of  $\mathbf{Y}^{ij}$ . The off-diagonal  
713 elements of  $\Sigma^{ij}$  are assumed to all be 0 (i.e. the uncertainty in each coordinate of a localization is assumed  
714 to be independent of its other coordinates). Assuming each molecule to be approximated by a point particle  
715 of zero size, the  $m^{\text{th}}$  diagonal element of  $\Sigma^{ij}$  is  $V_m^{ij} = \sigma_m^i{}^2 + \sigma_m^j{}^2$ , where  $\sigma_m^i$  denotes the standard deviation  
716 for the uncertainty in the  $m^{\text{th}}$  coordinate of localization  $i$ , as given by the input data.

717 This assumes that the true position is identical for all localizations originating from the same molecule.  
718 In practice, the fluorophore positions may be different from the actual molecule positions. For example,  
719 when molecules are detected using antibodies, the fluorophore conjugated to the antibody may be located  
720 as much as 10 nm away from the antibody's binding site. In addition, if each molecule can be labeled by  
721 more than one fluorophore, then the true positions of localizations originating from a single molecule will  
722 not only be different from the actual molecule but also from each other. If the sizes of the molecule and  
723 fluorescent label are not negligible, they can be approximately taken into account in the following way. For  
724 mathematical simplicity, we approximate the uncertainty due to the molecule and label size as an isotropic  
725 Gaussian distribution with variance  $(r/3)^2$ , where  $r$  is the effective radius of the molecule and fluorescent  
726 label combined, which is specified by the user based on underlying biophysical knowledge. We then add this  
727 variance term twice (once each for localizations  $\mathbf{X}^i$  and  $\mathbf{X}^j$ ) to each of the diagonal elements in  $\Sigma^{ij}$ . For  
728 our simulated data, this was not necessary as the true position of every localization was at the centre of a  
729 simulated molecule. For our BCR dSTORM data, we used  $r = 8$  nm.

730 Next, we construct the statistic  $Z^{ij} = \sum_{m=1}^d Y_m^{ij}{}^2 / V_m^{ij}$  for each pair of localizations, where  $d$  is the number  
731 of dimensions (2 or 3) and  $Y_m^{ij}$  denotes the  $m^{\text{th}}$  coordinate of the vector  $\mathbf{Y}^{ij}$ . If two localizations  $\mathbf{X}^i$  and  $\mathbf{X}^j$   
732 have the same true position, then  $Z^{ij}$  is chi-squared distributed with  $d$  degrees of freedom. We then look  
733 for pairs of localizations for which  $Z^{ij}$  exceeds a desired quantile of the appropriate chi-squared distribution,  
734 indicating confidence that they originated from different molecules. Because we are testing multiple pairs  
735 of localizations for significance, we correct for multiple hypothesis testing using the Šidák correction. If we  
736 desire a significance level of  $1 - q$ , then we look for pairs of localizations for which  $Z_{ij}$  exceeds the  $(q^{1/N})^{\text{th}}$   
737 quantile of the chi-squared distribution with  $d$  degrees of freedom. Here,  $N$  is the number of localizations  
738 in the cluster. Even though there are  $N(N - 1)/2$  pairs of localizations, the null hypotheses are that each  
739 localization originated from the same molecule as all other localizations in the cluster, and so there are only  
740  $N$  hypotheses to test. By default, StormGraph uses a significance level of 0.05, so it uses the  $(0.95^{1/N})^{\text{th}}$   
741 quantile. Finally, since a cluster must always contain at least three localizations (we do not consider pairs  
742 of localizations to be clusters), StormGraph increases confidence further by demanding that at least two

743 localizations are each, probabilistically, sufficiently far from at least two other localizations. This way, a  
744 single outlying localization within a cluster is not sufficient on its own to qualify the cluster as containing  
745 multiple molecules with high confidence.

## 746 **Guidelines for StormGraph parameter selection**

747 StormGraph has three user-controllable parameters. The optional parameter  $k$  specifies the number of nearest  
748 neighbors to use when calculating the graph neighborhood radius  $r_0$ . The value of  $k$ , if set, is the minimum  
749 (respectively maximum) number of neighbors that most clustered (respectively unclustered) localizations  
750 should have. It should be smaller than the number of localizations in a typical cluster, but preferably  
751 larger than the estimated number of times that a typical single molecule might blink. These values can be  
752 estimated by visual inspection of localization clusters within cell boundaries and on the coverslip outside of  
753 cells. Increasing  $k$ , and consequently  $r_0$ , can influence the exact placement of cluster boundaries, and hence  
754 cluster quantification, by allowing more low-density localizations on the periphery of clusters to be included  
755 in the clusters. This highlights the inherent ambiguity in clustering problems, which results from the lack of  
756 a clear definition of a cluster. We recommend values of  $k$  between 10 and 20 for most data. Alternatively,  
757 StormGraph can determine  $r_0$  heuristically without any user input (i.e. without  $k$ ), but this approach is  
758 designed for data with very few localizations dispersed in between clusters. Set  $k = 0$  in the software to use  
759 this mode of StormGraph. We advise that this mode should only be used if it is clear *a priori* that at least  
760 two thirds of localizations in each ROI belong to clusters.

761 The parameter  $\alpha$  controls the node-degree threshold used to identify and remove unclustered nodes prior  
762 to clustering. For data that does not suffer from overcounting of molecules, or for which overcounting has  
763 already been corrected,  $\alpha$  is effectively the maximum false positive rate (FPR) for classifying localizations as  
764 clustered if all localizations in a random distribution should be classified as unclustered. It can be regarded  
765 as a per-localization significance level. When overcounting is present in the data, the FPR may be greater  
766 than  $\alpha$ . Nevertheless, for any given  $\alpha < 1$ , StormGraph takes steps to minimize the FPR as far as possible.  
767 Hence, we suggest setting  $\alpha$  as the maximum fraction of localizations that the user would accept as being  
768 clustered if they were completely randomly distributed. For most applications, we recommend  $\alpha = 0.05$ , the  
769 default value. Larger values of  $\alpha$  might be suitable if the user is already confident that the localizations are  
770 strongly clustered but there is large variation in the density of clusters. For example,  $\alpha = 0.5$  would simply  
771 demand that clusters are at least as dense as the average density of a random distribution, but this could  
772 result in as many as 50% of localizations in a random distribution qualifying as clustered. Alternatively, the

773 user can choose to skip the thresholding step and instead allow all localizations to be possibly assigned to  
774 clusters by setting  $\alpha = 1$ , which ultimately removes all use of  $\alpha$  and  $k$  from the StormGraph algorithm.

775 Finally, the user can optionally set the minimum number of localizations that a cluster must contain,  
776 MinCluSize. One possible strategy for setting its value is to investigate clusters of localizations in background  
777 regions outside of cells, which are likely to be due to individual fluorescent labels stuck to the coverslip, and  
778 assess how many localizations are typical of these apparent clusters. However, because StormGraph provides  
779 an option to use localization uncertainties to identify and reclassify localization clusters that could have  
780 arisen just from overcounting of single molecules, clusters that could be due to single molecules can be  
781 automatically removed from analysis without the need for a minimum cluster size parameter. Note that  
782 StormGraph requires all clusters to contain at least three localizations, even if MinCluSize is not set.

## 783 **Computational approximations in StormGraph**

784 In order to improve computational efficiency, StormGraph includes some computational approximations.  
785 Firstly, neighborhood searches about each node are performed using the MATLAB function “rangesearch”,  
786 which uses a k-d tree, as this is faster than computing distances between all pairs of nodes. Without  
787 uncertainties in localization positions, rangesearch is implemented with a search radius of  $r_0$ . However,  
788 when Monte Carlo simulations are used to perturb localization positions using their uncertainties, it is  
789 inefficient to perform rangesearch for every simulation. Instead, StormGraph performs rangesearch just  
790 once, using an expanded search radius, to identify candidate edges for the graph. It then calculates expected  
791 edge weights only for the candidate edges. Since the computational time for rangesearch increases as the  
792 search radius increases, we chose  $(r_0 + 6 \times \text{mean localization uncertainty})$  as the expanded search radius  
793 because most pairs of nodes separated by distances greater than this would have only negligible or zero edge  
794 weights anyway. Increasing the search radius further would not only make rangesearch slower, but it could  
795 also add more edges to the graph and consequently increase the computational cost of community detection,  
796 even though the additional edges would be mostly negligible.

797 Secondly, StormGraph limits nodes to having no more than 500 neighbors in the graph. This is to  
798 prevent extremely dense, large clusters from dramatically slowing down community detection, since the  
799 computational time required by Infomap scales with the number of edges in the graph. In practice, for  
800 reasonably chosen values of  $k$ , e.g. in the range from 10 to 20, and for  $r_0$  values determined heuristically,  
801 very few nodes, if any, in most datasets should have this many neighbors.

802 Lastly, we note that StormGraph is not deterministic, meaning that it can give slightly different results

803 each time that it is run. This is for two reasons. The first reason is because StormGraph uses Infomap  
804 or the Louvain method to perform community detection. Infomap seeks to optimize the map equation and  
805 the Louvain method seeks to optimize modularity. In both cases, the full optimization problem is NP-  
806 hard. Therefore, both methods take a greedy approach to the optimization, which generally finds a local,  
807 but not necessarily global, optimum. They then select the best optimum from multiple iterations started  
808 from random initiations. In StormGraph, the default number of iterations used for finding the final cluster  
809 hierarchy is 50. Results can be improved at the expense of increasing computational time by increasing the  
810 number of iterations. Conversely, computational time can be reduced at the expense of cluster accuracy by  
811 decreasing the number of iterations. The second reason for slight variability in results is the use of Monte  
812 Carlo simulations by StormGraph. This variability can be decreased, again at the expense of increasing  
813 computational cost, by increasing the number of Monte Carlo simulations.

814 The non-deterministic nature of StormGraph is only a minor drawback, as variability in clustering results  
815 for a single dataset is small. To demonstrate this, we repeatedly applied StormGraph using identical settings  
816 to a heterogeneous dSTORM ROI containing visually ambiguous clusters. We did this in both 2D and 3D  
817 and for both the automatic and kNN methods for determining  $r_0$ , each time generating 11 StormGraph  
818 repeats. We then assessed the similarity of cluster assignments from each of the last 10 repeats to the first  
819 one using NMI, which can range from 0 to 1. We always achieved  $\text{NMI} > 0.94$ , indicating very high similarity  
820 (Figure S3).

## 821 **Simulating SMLM data in 2D and 3D**

822 In both 2D and 3D, except for the simulations used to test the Bayesian clustering method (29), we dis-  
823 tributed 3,000 molecules into circular nanoclusters with a fixed radius,  $r$ . These molecules were assigned  
824 to nanoclusters uniformly at random with a fixed average molecular density,  $\rho$ . Each molecule was as-  
825 signed uncertainties, which were sampled randomly from a real dSTORM dataset, in its  $x$ -,  $y$ - and (for  
826 3D)  $z$ -coordinates and a number of blinks, which was drawn from a geometric distribution (55) supported  
827 on  $\{1, 2, 3, \dots\}$  with success probability parameter  $\lambda$ . Within each nanocluster, molecules were distributed  
828 uniformly at random, and for each molecule the observed localizations (blinks) were drawn from a normal  
829 distribution with mean equal to the molecule's position and standard deviations equal to the uncertainties  
830 assigned to the molecule. Every observed localization was assigned the same uncertainties as its associated  
831 molecule. The total number of nanoclusters,  $N_{\text{nano}}$ , was determined by the total number of molecules in  
832 clusters (3,000) and the average density,  $\rho$ , of molecules within clusters.

833 The nanoclusters were positioned inside a  $2\ \mu\text{m} \times 2\ \mu\text{m}$  ROI in 2D or a  $2\ \mu\text{m} \times 2\ \mu\text{m} \times 1\ \mu\text{m}$  ROI in  
834 3D such that some existed as isolated nanoclusters and others were randomly aggregated into larger clusters  
835 according to the following process, which was adapted from a Dirichlet process: for  $i$  from 1 to  $N_{\text{nano}}$ , draw  
836 a random number from the uniform distribution on  $[0,1]$ ; if it is less than or equal to  $((p+10)/(p+i-1))^q$   
837 for positive integers  $p$  and  $q$ , then place the  $i^{\text{th}}$  nanocluster away from existing clusters; otherwise, add the  
838  $i^{\text{th}}$  nanocluster to a randomly selected existing cluster, excluding the first 10 nanoclusters that were placed.  
839 If a nanocluster was added to an existing cluster, it was placed such that its centre was exactly a distance  
840  $2r$  from the centre of another nanocluster in the same aggregate cluster, and without overlapping with any  
841 other existing nanoclusters in the aggregate cluster.

842 This process ensures that there are at least 10 isolated nanoclusters and a variable number of larger  
843 aggregate clusters of variable size, thus creating heterogeneous clusters. The heterogeneity is controlled by  
844 the parameters  $p$  and  $q$ . In our simulations, we fixed  $p = 5$  and varied  $q$  from 1 to 5, with larger values of  $q$   
845 resulting in larger (and fewer) cluster aggregates. Outside of the clusters, we added molecules uniformly at  
846 random at a specified average density, and the number and positions of observed localizations corresponding  
847 to each of these background molecules were drawn from geometric and normal distributions respectively, as  
848 described for the in-cluster localizations.

849 If the simulations were performed in 3D, points were then randomly removed such that the probability  
850 of a localization being observed in the final simulated data decayed according to a Gaussian profile as the  
851 axial distance from a central focal plane increased. This was to imitate the realistic scenario for most 3D  
852 SMLM techniques in which fluorescent blink events are more likely to be collected and localized the closer  
853 they are to the focal plane.

854 We generated 64 2D datasets with multiple blinking of molecules (e.g. Figures 2a–c and S7) by varying  
855 the following parameters: (1) the radius of the nanoclusters (20 nm, 30 nm or 50 nm), (2) the density of  
856 clustered molecules ( $0.01\ \text{nm}^{-2}$  or  $0.02\ \text{nm}^{-2}$ ), (3) the density of the random molecules (1%, 5%, 10%, 20%  
857 or 40% of the within-cluster molecular density), (4) the average number of blinks per molecule (4/3, 2 or 4;  
858 these values provide examples ranging from cases in which most molecules blink only once to cases where  
859 the molecules could be bivalent and labeled by fluorophores that blink on average twice, which is typical for  
860 the photoactivatable fluorophore mEos2 (14; 56)), and (5) the propensity for nanoclusters to coalesce into  
861 larger aggregate clusters (parameter  $q$ ).

862 We generated 130 3D datasets analogously but using within-cluster molecular densities of  $1 \times 10^{-4}\ \text{nm}^{-3}$   
863 and  $2 \times 10^{-4}\ \text{nm}^{-3}$ . In 3D, we used nanoclusters of radii 30 nm and 50 nm, and we used densities of random,



864 unclustered molecules equal to 1%, 5%, 10% or 20% of the within-cluster molecular density. At 20%, clusters  
865 were barely visible in 2D projections of the simulated 3D data onto the  $xy$ -plane.

866 Simulations of  $1\ \mu\text{m} \times 1\ \mu\text{m}$  ROIs for comparison of StormGraph to the Bayesian method of Rubin-  
867 Delanchy et al. (29) followed the above methods for simulating 2D ROIs but with the following modifications.  
868 The total number of molecules belonging to clusters was reduced from 3,000 to 1,000. The minimum number  
869 of isolated nanoclusters guaranteed to not form larger aggregates was reduced from 10 to 3. Circular  
870 nanoclusters had radius  $r = 30\ \text{nm}$  and average molecular density  $\rho = 0.01\ \text{nm}^{-2}$  in all simulations. The  
871 values used for the average number of blinks per molecule were  $4/3$  and 2, and the values used for the  
872 parameter  $q$  were 1, 3, and 5. We simulated a total of 30 ROIs that were  $1\ \mu\text{m} \times 1\ \mu\text{m}$ .

### 873 **Running ClusterViSu on simulated data**

874 The ClusterViSu algorithm consists of running a series of two functions provided as part of its source code,  
875 specifically the functions “VoronoiMonteCarlo” and “VoronoiSegmentation”. However, the authors did not  
876 provide a script for running ClusterViSu. Hence, for users with zero programming expertise, it can only  
877 be run using a graphical user interface that requires each file to be loaded and analyzed separately. Also,  
878 ClusterViSu outputs the bounding polygon for each detected cluster but not the actual cluster assignments of  
879 the localizations, which we needed to compute NMI and mean F-measure scores for assessing the performance  
880 of cluster assignment. Therefore, we wrote our own custom MATLAB script (available upon request) to run  
881 and batch process ClusterViSu from its source code and subsequently determine the cluster assignments of  
882 the localizations. In addition, ClusterViSu prefers input ROIs to be at least  $18\ \mu\text{m} \times 18\ \mu\text{m}$ , so we rescaled  
883 our  $2\ \mu\text{m} \times 2\ \mu\text{m}$  simulated data by a factor of 9, which drastically improved ClusterViSu’s performance,  
884 at least in terms of computational time.

885 Furthermore, we only included ClusterViSu results for simulated datasets on which ClusterViSu analysis  
886 completed in under 2 hours. This resulted in 15 out of 64 simulated datasets being excluded from our  
887 summary of test results for ClusterViSu, but these 15 datasets were still included for assessing StormGraph  
888 and DBSCAN. However, these 15 datasets were excluded in Figures 2d and S4a(iii), where NMI or mean  
889 F-measure results for StormGraph and DBSCAN are shown as a ratio to the NMI or mean F-measure results  
890 for ClusterViSu.

## 891 **Functionalization of glass coverslips for cell adherence**

892 Glass coverslips were cleaned and functionalized as previously described (57). Briefly, acid-cleaned glass cov-  
893 erslips (Marienfeld #1.5H, 18 mm × 18 mm; catalogue #0107032, Lauda-Königshofen, Germany) were incu-  
894 bated with 0.01% poly-L-lysine (Sigma-Aldrich; catalogue #P4707) or 0.25 μg/cm<sup>3</sup> of the non-stimulatory  
895 M5/114 anti-MHCII monoclonal antibody (Millipore; catalogue #MABF33) or 2 μg/cm<sup>2</sup> fibronectin (Sigma  
896 Aldrich; catalogue #F4759) for at least 3 h at 37 °C. The slides were then washed with phosphate-buffered  
897 saline (PBS) prior to being used for experiments.

## 898 **Monovalent Fab fragments and antibodies**

899 The anti-mouse-Igκ antibody for clustering BCRs was purchased from Southern Biotech (Birmingham,  
900 AL; catalogue #1050-01). AF647-conjugated anti-mouse-IgM Fab fragments (catalogue #115-607-020) and  
901 AF647-conjugated anti-human-IgM Fab fragments (catalogue #109-607-043) were from Jackson ImmunoRe-  
902 search Laboratories (West Grove, PA). All Fab fragments were routinely tested for aggregation using dynamic  
903 light scattering (Zetasizer Nano) and unimodal size distributions were observed. Anti-LAMP-1 antibody was  
904 purchased from Abcam (catalogue #ab24170). AF647-conjugated goat anti-mouse-IgG (catalogue #A21236)  
905 and AF647-conjugated goat anti-rabbit-IgG (catalogue #A21244) were purchased from ThermoFisher Sci-  
906 entific. Goat anti-mouse-IgG (Jackson ImmunoResearch Laboratories; catalogue #115-005-008) and goat  
907 anti-rabbit-IgG (Jackson ImmunoResearch Laboratories; catalogue #111-001-008) were conjugated to Cy3B  
908 using a Pierce antibody conjugation kit (catalogue #44985).

## 909 **Cell labeling for dSTORM**

### 910 **(1) Murine splenic B cells**

911 Animal protocols were approved by the University of British Columbia and all animal experiments were  
912 carried out in accordance with institutional regulations. Splenic B cells were obtained from 6- to 10-week  
913 old C57BL/6 mice (Jackson Laboratory) of either sex using a B-cell isolation kit (Stemcell Technologies;  
914 catalogue #19854) to deplete non-B cells. To induce IgM-BCR clustering,  $5 \times 10^6$  *ex vivo* splenic B cells/mL  
915 were stimulated with 20 μg/mL anti-Igκ in PBS for 10 min at 37 °C. A similar volume of PBS was added to  
916 control samples (resting B cells). All subsequent procedures were performed at 4 °C. Cells were washed three  
917 times with ice-cold PBS, and IgM-BCRs on the cell surface were labeled using AF647-conjugated monovalent  
918 anti-mouse-IgM Fab fragments for 15 min. These Fab fragments bind to the constant region of the μ heavy

919 chain of IgM-BCRs, which is distinct from sites on the IgM-BCR that the anti-Ig $\kappa$  treatment antibody binds  
920 to. Following multiple PBS washes, cells were settled onto pre-cooled anti-MHCII-functionalized coverslips  
921 for 10 min and subsequently fixed with PBS containing 4% paraformaldehyde and 0.2% glutaraldehyde for 90  
922 min. The coverslips were washed thoroughly with PBS and fiducial markers (100 nm diameter; ThermoFisher  
923 Scientific, catalogue #F8799) were allowed to settle onto the coverslip overnight at 4 °C. Unbound fiducial  
924 markers were removed by PBS washes and the stuck particles were used for real-time drift stabilization (58).

## 925 **(2) Human and murine B-lymphoma cell lines**

926 A20 and BJAB B-lymphoma cells were obtained from American Type Culture Collection (ATCC). HBL-1  
927 cells were obtained from Dr. Izidore S. Lossos, Sylvester Comprehensive Cancer Center, University of Miami  
928 (Miami, FL). TMD8 cells were a gift from Dr. Neetu Gupta, Lerner Research Institute, Cleveland Clinic  
929 (Cleveland, OH). All B-cell lines were cultured in RPMI-1640 (Life Technologies; catalogue #21870-076),  
930 supplemented with 10% heat-inactivated fetal bovine serum, 2 mM L-glutamine, 50  $\mu$ M  $\beta$ -mercaptoethanol,  
931 1 mM sodium pyruvate, 50 U/mL penicillin, and 50  $\mu$ g/mL streptomycin (complete medium). All cell lines  
932 were authenticated by STR DNA profile analysis.

933 All staining procedures were performed at 4 °C. Cell-surface IgM-BCRs on BJAB, HBL-1 and TMD8 cells  
934 were labeled using AF647-conjugated anti-human-IgM Fab fragments for 15 min. Cell-surface IgG-BCRs on  
935 A20 cells (ATCC) were labeled using both AF647-conjugated anti-mouse-IgG and Cy3B-conjugated anti-  
936 mouse-IgG at 1:1 stoichiometry for 15 min. Fc receptors on A20 cells were blocked prior to staining using the  
937 2.4G2 rat anti-Fc $\gamma$  receptor monoclonal antibody. Cells were washed in PBS and subsequently fixed with  
938 ice-cold PBS containing 4% paraformaldehyde and 0.2% glutaraldehyde for 60 min. Following multiple PBS  
939 washes, the cells were settled onto pre-cooled poly-L-lysine-coated coverslips for 15 min and subsequently  
940 fixed again for 30 min. The coverslips were washed thoroughly with PBS and fiducial markers were added  
941 and incubated overnight at 4 °C.

## 942 **(3) B16 melanoma cell lines**

943 B16F1 melanoma cells (ATCC) were grown in RPMI-1640 complete medium. Approximately  $3 \times 10^4$  cells  
944 were seeded on fibronectin-coated coverslips for 1 h and fixed with PBS containing 4% paraformaldehyde  
945 for 30 min. Cells were permeabilized with 0.1% Triton X-100 for 10 min, washed with PBS, and incubated  
946 for 30 min at room temperature (RT) with Image-IT FX Signal Enhancer (Life Technologies, catalogue  
947 #I36933) to neutralize surface charge. Cells were washed briefly in PBS and then incubated with BlockAid

948 blocking solution (Life Technologies; catalogue #B10710) for 1 h at RT. The cells were incubated with  
949 anti-LAMP-1 antibody (diluted in BlockAid) for 4 h at RT. Following PBS washes, cells were incubated  
950 with both AF647-conjugated anti-rabbit-IgG and Cy3B-conjugated anti-rabbit-IgG at 1:1 stoichiometry for  
951 90 min. Cells were washed in PBS and subsequently fixed again with 4% paraformaldehyde for 10 min. The  
952 coverslips were washed thoroughly with PBS and fiducial markers were added and incubated overnight at  
953 4 °C.

## 954 **dSTORM**

955 Imaging was performed using a custom-built microscope with a sample drift-stabilization system that has  
956 been described previously (58; 59). Briefly, three lasers were used in the excitation path. These were a 639 nm  
957 laser (Genesis MX639, Coherent) for exciting the AF647, a 532 nm laser (Laser quantum, Opus) for exciting  
958 the photo-switchable Cy3B, and a 405 nm laser (LRD 0405, Laserglow Technologies) for reactivating the  
959 AF647 and Cy3B. All three lasers were coupled into an inverted microscope equipped with an apochromatic  
960 TIRF oil-immersion objective lens (60x; NA 1.49; Nikon). The emission fluorescence was separated using  
961 appropriate dichroic mirrors and filters (Semrock) (58; 59), and detected by EM-CCD cameras (Ixon, Andor).  
962 A feedback loop was employed to lock the position of the sample during image acquisition using immobile  
963 fiducial markers. Sample drift was controlled to be less than 1 nm laterally and 2.5 nm axially.

## 964 **dSTORM image acquisition and reconstruction**

965 Imaging was performed in an oxygen-scavenging GLOX-thiol buffer consisting of 50 mM Tris-HCl, pH  
966 8.0, 10 mM NaCl, 0.5 mg/ml glucose oxidase, 40 µg/ml catalase, 10% (w/v) glucose and 140 mM 2-  
967 mercaptoethanol (60). The coverslip with attached cells was mounted onto a depression slide filled with  
968 imaging buffer and sealed with Twinsil two-component silicone-glu (Picodent; catalogue #13001000).

969 For SMLM imaging, a laser power density of 1 kW/cm<sup>2</sup> for the 639 nm and 532 nm lasers was used  
970 to activate the AF647 and Cy3B, respectively. For each sample,  $4 \times 10^4$  images were acquired for each  
971 color channel at 50 Hz. Localization coordinates and their associated uncertainties were computationally  
972 determined simultaneously by fitting a function to the intensity profile of each fluorescence event using  
973 MATLAB (Figure S13), as described previously (59). Expressed as standard deviations, lateral uncertainties  
974 were typically < 10 nm while axial uncertainties were typically < 40 nm (Figure S13).

975 For two-color SMLM, image acquisition was performed sequentially for each color with AF647 imaged  
976 first to prevent photobleaching by the Cy3B excitation laser. Two-color SMLM images were acquired using

977 a beam splitter with appropriate filters to direct each signal to one of two independent cameras. Alignment  
978 of these two colors was carried out using  $\sim 4 \times 10^4$  images of fluorescent beads simultaneously recorded at  
979 various positions to find an optimal geometric transformation. The resulting color-alignment error is  $\sim 10$  nm  
980 root mean squared.

## 981 **Acknowledgements**

982 We thank Alejandra Herrera-Reyes for helpful discussions and code, Ki Woong Sung for preliminary compu-  
983 tational work, Dr. Vivian Qian Liu for assistance with dSTORM data fitting, Dr. Neetu Gupta for TMD8  
984 cells, Dr. Izidore S. Lossos for HBL-1 cells, and Dr. David R.L. Scriven for helpful discussion. This work  
985 was supported by funding from the Natural Science and Engineering Research Council of Canada (Discovery  
986 Grant RGPIN-2015-04611 to DC, an Undergraduate Student Research Award to DWZ, Discovery Grant  
987 RGPIN-2014-03581 to KCC, and Discovery Grant RGPIN-2017-04862 to MRG), the Canadian Cancer So-  
988 ciety Research Institute (Innovation Grant 704254 to DC and MRG), the Canadian Institutes of Health  
989 Research (PJT-19426 to MRG), and Canada Foundation for Innovation (to KCC).

## 990 **Author contributions**

991 JMS conceived the project, developed and tested the StormGraph algorithm and software, proposed exper-  
992 iments, performed data analysis, produced figures, and wrote the manuscript. LA proposed and performed  
993 experiments, wrote experimental methods, produced figures, and provided essential feedback about the al-  
994 gorithm and software. DWZ assisted with software development, simulation of data, and algorithm testing.  
995 RT built the dSTORM microscope and assisted with dSTORM data fitting and processing. KCC provided  
996 code for fitting dSTORM localizations and aligning two-color dSTORM data. MRG and DC supervised the  
997 project and wrote the manuscript. All authors approved the final manuscript.

## 998 **Competing interests statement**

999 The authors declare no competing interests.

## References

- [1] Owen, D. *et al.* PALM imaging and cluster analysis of protein heterogeneity at the cell surface. *J. Biophotonics* **3**, 446–454 (2010).
- [2] Mattila, P. *et al.* The actin and tetraspanin networks organize receptor nanoclusters to regulate B cell receptor-mediated signaling. *Immunity* **38**, 461–474 (2013).
- [3] Grove, J. *et al.* Flat clathrin lattices: stable features of the plasma membrane. *Molecular Biology of the Cell* **25**, 3581–94 (2014).
- [4] Pollitt, A. *et al.* Syk and Src family kinases regulate C-type lectin receptor 2 (CLEC-2)-mediated clustering of podoplanin and platelet adhesion to lymphatic endothelial cells. *The Journal of Biological Chemistry* **289**, 35695–710 (2014).
- [5] Hartley, J. *et al.* Super-resolution imaging and quantitative analysis of membrane protein/lipid raft clustering mediated by cell-surface self-assembly of hybrid nanoconjugates. *Chembiochem* **16**, 1725–9 (2015).
- [6] Roh, K.-H., Lillemeier, B. F., Wang, F. & Davis, M. M. The coreceptor CD4 is expressed in distinct nanoclusters and does not colocalize with T-cell receptor and active protein tyrosine kinase p56lck. *Proceedings of the National Academy of Sciences* **112**, E1604–E1613 (2015).
- [7] Gao, L., Chen, J., Gao, J., Wang, H. & Xiong, W. Super-resolution microscopy reveals the insulin-resistance-regulated reorganization of GLUT4 on plasma membranes. *Journal of Cell Science* **130**, 396–405 (2017).
- [8] Rahbek-Clemmensen, T. *et al.* Super-resolution microscopy reveals functional organization of dopamine transporters into cholesterol and neuronal activity-dependent nanodomains. *Nature Communications* **8**, 740 (2017).
- [9] Eryilmaz, M. *et al.* Localization microscopy analyses of MRE11 clusters in 3D-conserved cell nuclei of different cell lines. *Cancers* **10**, 25 (2018).
- [10] Gao, J. *et al.* Revealing the cellular localization of STAT1 during the cell cycle by super-resolution imaging. *Scientific Reports* **5**, 9045 (2015).

- [11] Heilemann, M. *et al.* Subdiffraction-resolution fluorescence imaging with conventional fluorescent probes. *Angew Chem Int Ed Engl* **47**, 6172–6176 (2008).
- [12] van de Linde, S. *et al.* Direct stochastic optical reconstruction microscopy with standard fluorescent probes. *Nat Protoc* **6**, 991–1009 (2011).
- [13] Betzig, E. *et al.* Imaging intracellular fluorescent proteins at nanometer resolution. *Science* **313**, 1642–1645 (2006).
- [14] Shivanandan, A., Deschout, H., Scarselli, M. & Radenovic, A. Challenges in quantitative single molecule localization microscopy. *FEBS Letters* **588**, 3595–3602 (2014).
- [15] Thompson, R., Larson, D. & Webb, W. Precise nanometer localization analysis for individual fluorescent probes. *Biophys. J.* **82**, 2775–2783 (2002).
- [16] Mortensen, K., Churchman, L., Spudich, J. & Flyvbjerg, H. Optimized localization analysis for single-molecule tracking and super-resolution microscopy. *Nat. Methods* **7**, 377–381 (2010).
- [17] Juette, M. *et al.* Three-dimensional sub-100 nm resolution fluorescence microscopy of thick samples. *Nat. Methods* **5**, 527–529 (2008).
- [18] Huang, B., Wang, W., Bates, M. & Zhuang, X. Three-dimensional super-resolution imaging by stochastic optical reconstruction microscopy. *Science* **319**, 810–813 (2008).
- [19] Pavani, S. *et al.* Three-dimensional, single-molecule fluorescence imaging beyond the diffraction limit by using a double-helix point spread function. *Proc. Natl. Acad. Sci.* **106**, 2995–2999 (2009).
- [20] Aquino, D. *et al.* Two-color nanoscopy of three-dimensional volumes by 4Pi detection of stochastically switched fluorophores. *Nat. Methods* **8**, 353–359 (2011).
- [21] Ripley, B. Modelling spatial patterns. *J. R. Stat. Soc. Series B Stat. Methodol.* **39**, 172–192 (1977).
- [22] Kiskowski, M., Hancock, J. & Kenworthy, A. On the use of Ripley’s K-function and its derivatives to analyze domain size. *Biophys J.* **97**, 1095–1103 (2009).
- [23] Ester, M., Kriegel, H., Sander, J. & Xu, X. A density-based algorithm for discovering clusters in large spatial databases with noise. In *Proceedings of the Second International Conference on Knowledge Discovery and Data Mining.*, 226–231. KDD-96 (AAAI Press, 1996).



- [24] Levet, F. *et al.* SR-Tesseler: a method to segment and quantify localization-based super-resolution microscopy data. *Nature Methods* **12**, 1065–1071 (2015).
- [25] Andronov, L., Orlov, I., Lutz, Y., Vonesch, J. & Klaholz, B. ClusterViSu, a method for clustering of protein complexes by Voronoi tessellation in super-resolution microscopy. *Sci. Rep.* **6** (2016).
- [26] Andronov, L. *et al.* 3DClusterViSu: 3D clustering analysis of super-resolution microscopy data by 3D Voronoi tessellations. *Bioinformatics* **34**, 3004–3012 (2018).
- [27] Mazouchi, A. & Milstein, J. Fast Optimized Cluster Algorithm for Localizations (FOCAL): a spatial cluster analysis for super-resolved microscopy. *Bioinformatics* **32**, 747–754 (2016).
- [28] Nan, X. *et al.* Single-molecule superresolution imaging allows quantitative analysis of RAF multimer formation and signaling. *Proc Natl Acad Sci USA* **110**, 18519–18524 (2013).
- [29] Rubin-Delanchy, P. *et al.* Bayesian cluster identification in single-molecule localization microscopy data. *Nature Methods* **12**, 1072–1076 (2015).
- [30] Griffié, J. *et al.* 3D Bayesian cluster analysis of super-resolution data reveals LAT recruitment to the T cell synapse. *Sci. Rep.* **7** (2017).
- [31] Khater, I., Meng, F., Wong, T., Nabi, I. & Hamarneh, G. Super resolution network analysis defines the molecular architecture of caveolae and caveolin-1 scaffolds. *Sci. Rep.* **8** (2018).
- [32] Levine, J. *et al.* Data-driven phenotypic dissection of aml reveals progenitor-like cells that correlate with prognosis. *Cell* **162**, 184–197 (2015).
- [33] Fortunato, S. Community detection in graphs. *Physics Reports* **486**, 75–174 (2010).
- [34] Endesfelder, U. *et al.* Multiscale spatial organization of RNA polymerase in *Escherichia coli*. *Biophys J.* **105**, 172–181 (2013).
- [35] Rosvall, M. & Bergstrom, C. Multilevel compression of random walks on networks reveals hierarchical organization in large integrated systems. *PLoS ONE* **6**, e18209 (2011).
- [36] Strehl, A. & Ghosh, J. Cluster ensembles – a knowledge reuse framework for combining multiple partitions. *J. Mach. Learn. Res.* **3**, 583–617 (2002).
- [37] Lancichinetti, A. & Fortunato, S. Consensus clustering in complex networks. *Scientific Reports* **2** (2012).

- [38] Danon, L., Díaz-Guilera, A., Duch, J. & Arenas, A. Comparing community structure identification. *J. Stat. Mech.* 09008 (2005).
- [39] Aghaeepour, N. *et al.* Critical assessment of automated flow cytometry data analysis techniques. *Nat. Methods* **10**, 228–238 (2013).
- [40] Maity, P. *et al.* B cell antigen receptors of the IgM and IgD classes are clustered in different protein islands that are altered during B cell activation. *Sci. Signal.* **8**, ra93 (2015).
- [41] Harwood, N. E. & Batista, F. D. Early events in B cell activation. *Annual Review of Immunology* **28**, 185–210 (2010).
- [42] Davis, R. *et al.* Chronic active B-cell-receptor signalling in diffuse large B-cell lymphoma. *Nature* **463**, 88–92 (2010).
- [43] Jaccard, P. The distribution of the flora of the alpine zone. *New Phytologist* **11**, 37–50 (1912).
- [44] Levet, F. *et al.* A tessellation-based colocalization analysis approach for single-molecule localization microscopy. *Nature Communications* **10**, 2379 (2019).
- [45] Annibale, P., Vanni, S., Scarselli, M., Rothlisberger, U. & Radenovic, A. quantitative photo activated localization microscopy: Unraveling the effects of photoblinking. .
- [46] Lee, S.-H., Shin, J. Y., Lee, A. & Bustamante, C. Counting single photoactivatable fluorescent molecules by photoactivated localization microscopy (PALM). *Proceedings of the National Academy of Sciences* **109**, 17436–17441 (2012). URL <https://www.pnas.org/content/109/43/17436>. <https://www.pnas.org/content/109/43/17436.full.pdf>.
- [47] Comaniciu, D. & Meer, P. Mean shift: a robust approach toward feature space analysis. *IEEE Transactions on Pattern Analysis and Machine Intelligence* **24**, 603–619 (2002).
- [48] Chacón, J. E. & Monfort, P. A comparison of bandwidth selectors for mean shift clustering. *arXiv e-prints* arXiv:1310.7855 (2013). 1310.7855.
- [49] Shivanandan, A., Unnikrishnan, J. & Radenovic, A. Accounting for limited detection efficiency and localization precision in cluster analysis in single molecule localization microscopy. *PLoS ONE* **10**, e0118767 (2015).

- [50] Arias-Castro, E. Clustering based on pairwise distances when the data is of mixed dimensions. *IEEE Transactions on Information Theory* **57**, 1692–1706 (2011).
- [51] Rosvall, M. & Bergstrom, C. Maps of random walks on complex networks reveal community structure. *Proceedings of the National Academy of Sciences* **105**, 1118–1123 (2008).
- [52] Blondel, V., Guillaume, J., Lambiotte, R. & Lefebvre, E. Fast unfolding of communities in large networks. *Journal of Statistical Mechanics: Theory and Experiment* **10**, 10008 (2008).
- [53] Rousseeuw, P. J. Silhouettes: A graphical aid to the interpretation and validation of cluster analysis. *Journal of Computational and Applied Mathematics* **20**, 53–65 (1987).
- [54] Tibshirani, R., Walther, G. & Hastie, T. Estimating the number of clusters in a data set via the gap statistic. *J. R. Statist. Soc. B* **63**, 411–423 (2001).
- [55] Nino, D., Rafiei, N., Wang, Y., Zilman, A. & Milstein, J. Molecular counting with localization microscopy: A Bayesian estimate based on fluorophore statistics. *Biophysical Journal* **112**, 1777–1785 (2017).
- [56] Fricke, F., Beaudouin, J., Eils, R. & Heilemann, M. One, two or three? Probing the stoichiometry of membrane proteins by single-molecule localization microscopy. *Scientific Reports* **5** (2015).
- [57] Abraham, L. *et al.* Limitations of Qdot labelling compared to directly-conjugated probes for single particle tracking of B cell receptor mobility. *Scientific Reports* **7** (2017).
- [58] Tafteh, R. *et al.* Real-time 3D stabilization of a super-resolution microscope using an electrically tunable lens. *Opt. Express* **24**, 22959–22970 (2016).
- [59] Tafteh, R., Scriven, D. R. L., Moore, E. D. W. & Chou, K. C. Single molecule localization deep within thick cells; a novel super-resolution microscope. *J. Biophoton.* **9**, 155–160 (2016).
- [60] Dempsey, G. T., Vaughan, J. C., Chen, K. H., Bates, M. & Zhuang, X. Evaluation of fluorophores for optimal performance in localization-based super-resolution imaging. *Nature Methods* **8**, 1027–1036 (2011).

## Figures and figure legends

Figure 1.

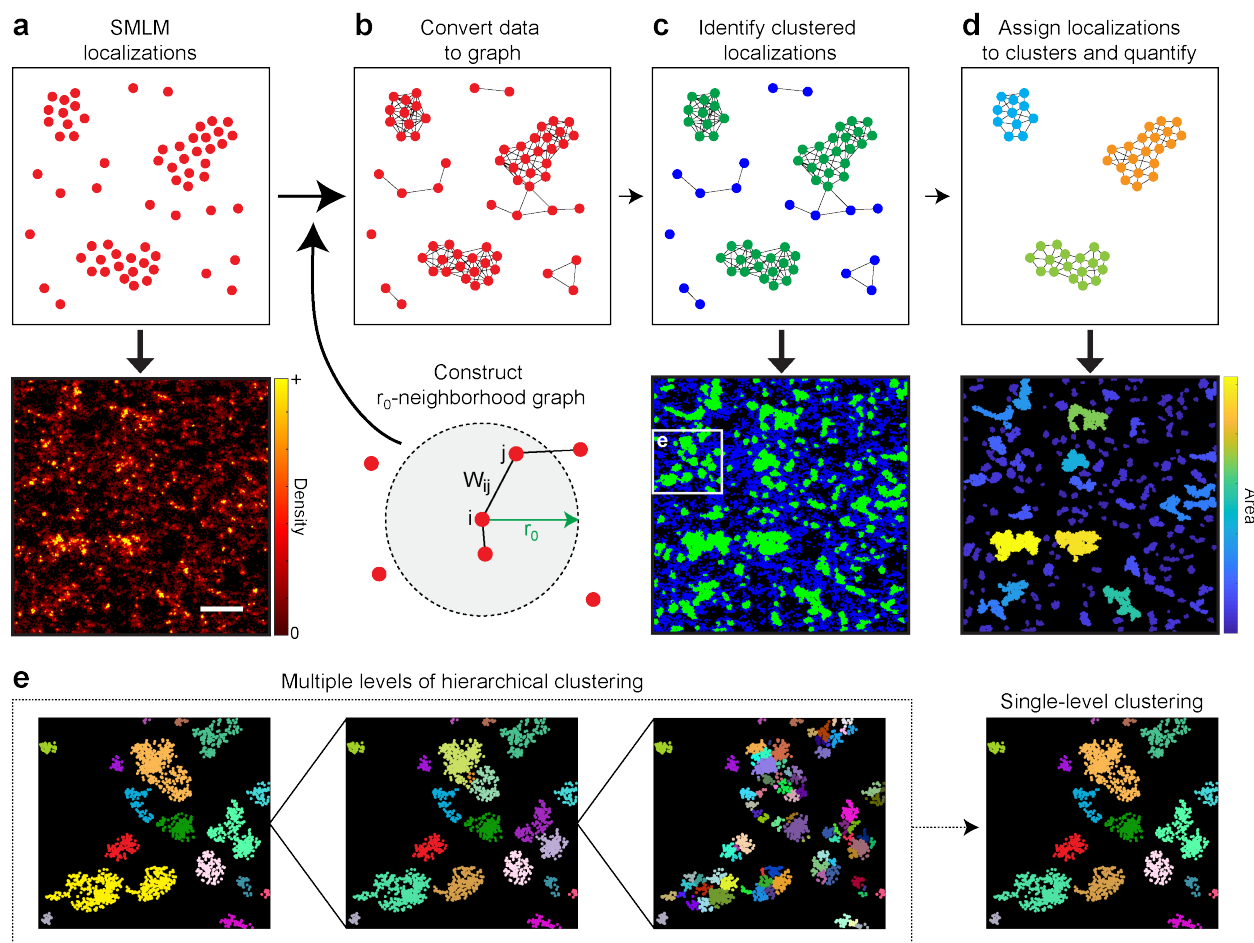

Scurll *et al*, Figure 1

Figure 1: **Schematic illustration of StormGraph's workflow.** (a–d) SMLM localizations are used as nodes (a) and converted into a weighted graph (b). This graph is based on  $r_0$ -neighborhood graphs, where edges connect each node to all other nodes within a distance  $r_0$ . Two nodes  $i$  and  $j$  are connected by an edge of weight  $W_{ij}$ , which describes their similarity based on the distance between them and, if known, their positional uncertainties. Nodes are classified as either clustered (green) or unclustered (blue) based on their node degree, i.e. sum of adjacent edge weights, (c). A new graph is constructed from only the clustered nodes, which are then assigned to specific clusters using a community detection algorithm (d). Cluster properties (e.g. area) can then be quantified. The bottom panels in (a), (c), and (d) illustrate each step for an actual SMLM region of interest (scale bar = 500 nm). (e) StormGraph identifies a hierarchy of clusters at multiple scales and then additionally generates a single-level clustering from the hierarchy. Shown are three different levels from the cluster hierarchy for the region in the white box in the lower panel of (c), along with the single-level clustering for this region. Colors distinguish different clusters.

Figure 2.

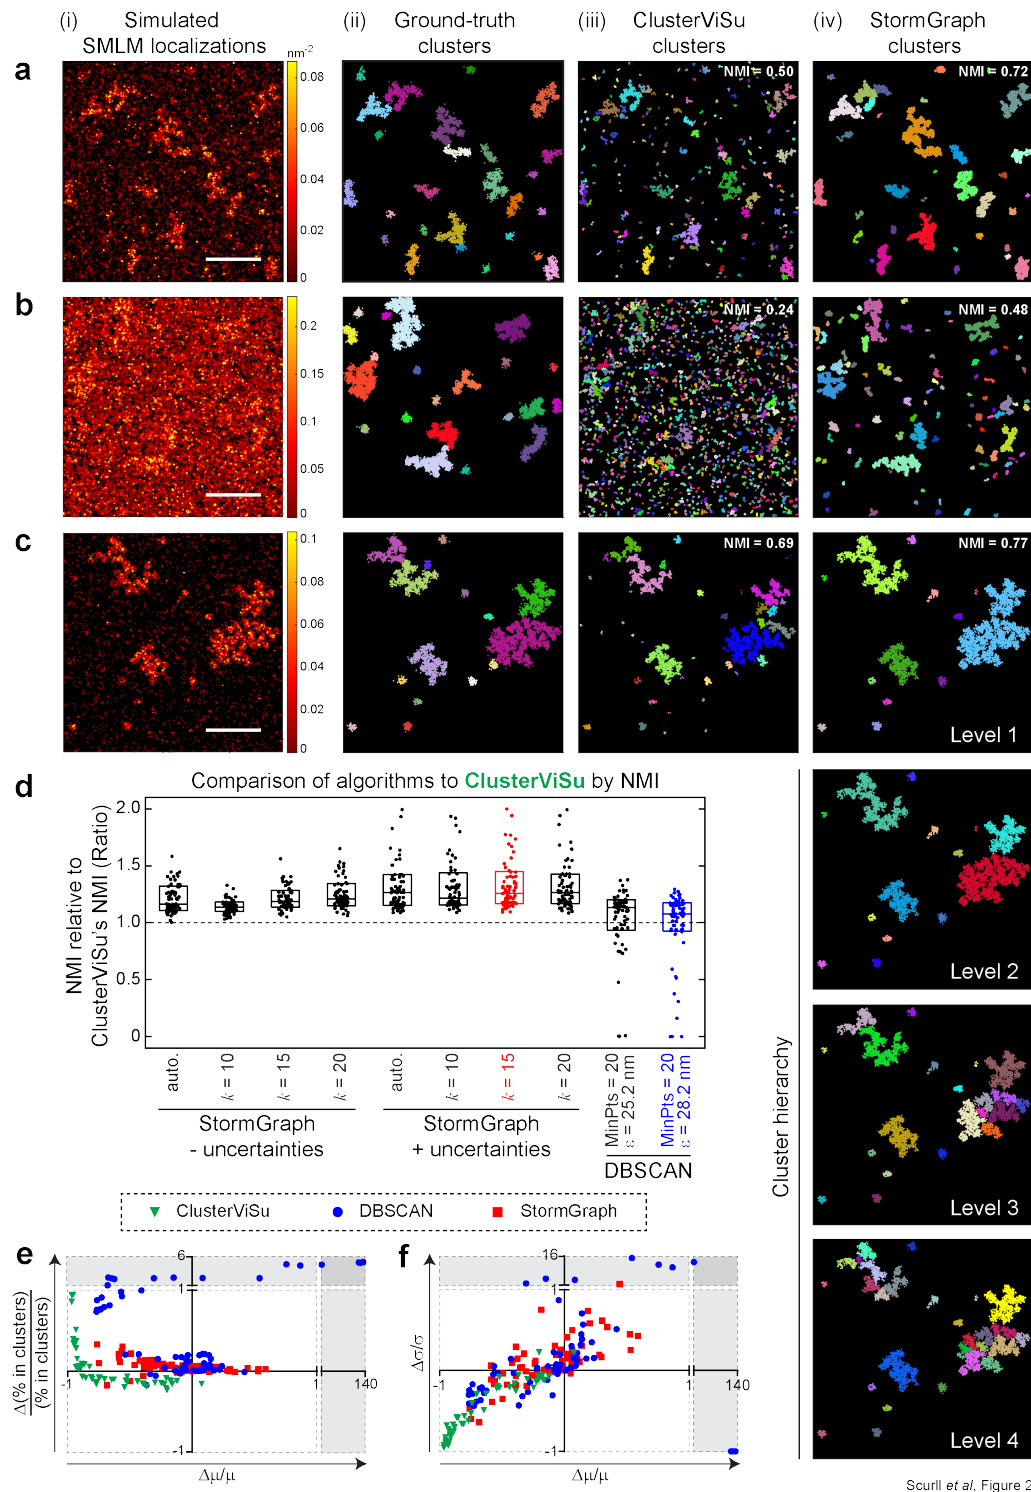

Figure 2: Continued on next page.

**Figure 2: StormGraph consistently outperforms ClusterViSu and DBSCAN on simulated data.**

**(a–c)** (i) Examples of simulated data (color bar = density, scale bar = 500 nm), (ii) their ground-truth clusters, and cluster assignment results with corresponding absolute normalized mutual information (NMI) values (1 = perfect) for (iii) ClusterViSu and (iv) StormGraph (+ uncertainties;  $k = 15$ ; single-level). Colors distinguish distinct clusters. Also shown are four levels (Levels 1–4) of the multi-level cluster hierarchy output by StormGraph for (c)(i). In this particular example, the single-level clustering (c)(iv) generated by StormGraph and the coarsest level (Level 1) of the cluster hierarchy were identical, but this is not the case in general. **(d)** Ratios of the performances of StormGraph and DBSCAN to the performances of ClusterViSu when performance was evaluated by NMI of cluster assignments compared to ground truth. Ratios  $> 1$  (respectively  $< 1$ ) indicate that StormGraph or DBSCAN performed better (respectively worse) than ClusterViSu. A total of 64 simulated ROIs were analyzed, including the ones shown in (a–c). We terminated ClusterViSu if it took longer than 2 h to analyze an ROI, which resulted in the exclusion of 15 out of 64 ROIs. StormGraph was run either with (+) or without (-) localization uncertainties and using either the heuristic method (auto.) or the kNN method with  $k = 10, 15$ , or 20 to set  $r_0$ . DBSCAN was implemented using 16 different selections of its two parameters, MinPts and  $\epsilon$ , of which the two best-performing are shown. Cluster assignment results were scored using NMI and the scores for StormGraph and DBSCAN were divided by the scores for ClusterViSu. Each dot in the figure shows the NMI ratio for one of the 49 simulated ROIs analyzed by all three algorithms. Boxes show medians and interquartile ranges. **(e–f)** Cluster quantification errors by StormGraph, ClusterViSu, and DBSCAN relative to ground truth. The fractional error in the percentage of localizations assigned to clusters (e) and the fractional error,  $\Delta\sigma/\sigma$ , in the standard deviation,  $\sigma$ , of number of localizations per cluster (f) are plotted *versus* the fractional error,  $\Delta\mu/\mu$ , in the mean number of localizations per cluster,  $\mu$ , for each of the 64 simulated ROIs for StormGraph and DBSCAN. For ClusterViSu, the errors are plotted for the 49 ROIs for which analysis was completed in under 2 h. N.b.  $\pm 1$  means  $\pm 100\%$  error, and errors greater than 100% are shown in the shaded regions, which have different axis scales. The colors in (e–f) correspond to the algorithm and parameters used and match the colors in (d): +uncertainties,  $k = 15$  for StormGraph; MinPts = 20,  $\epsilon = 28.2$  nm for DBSCAN. These DBSCAN parameters achieved the highest median absolute NMI.

Figure 3.

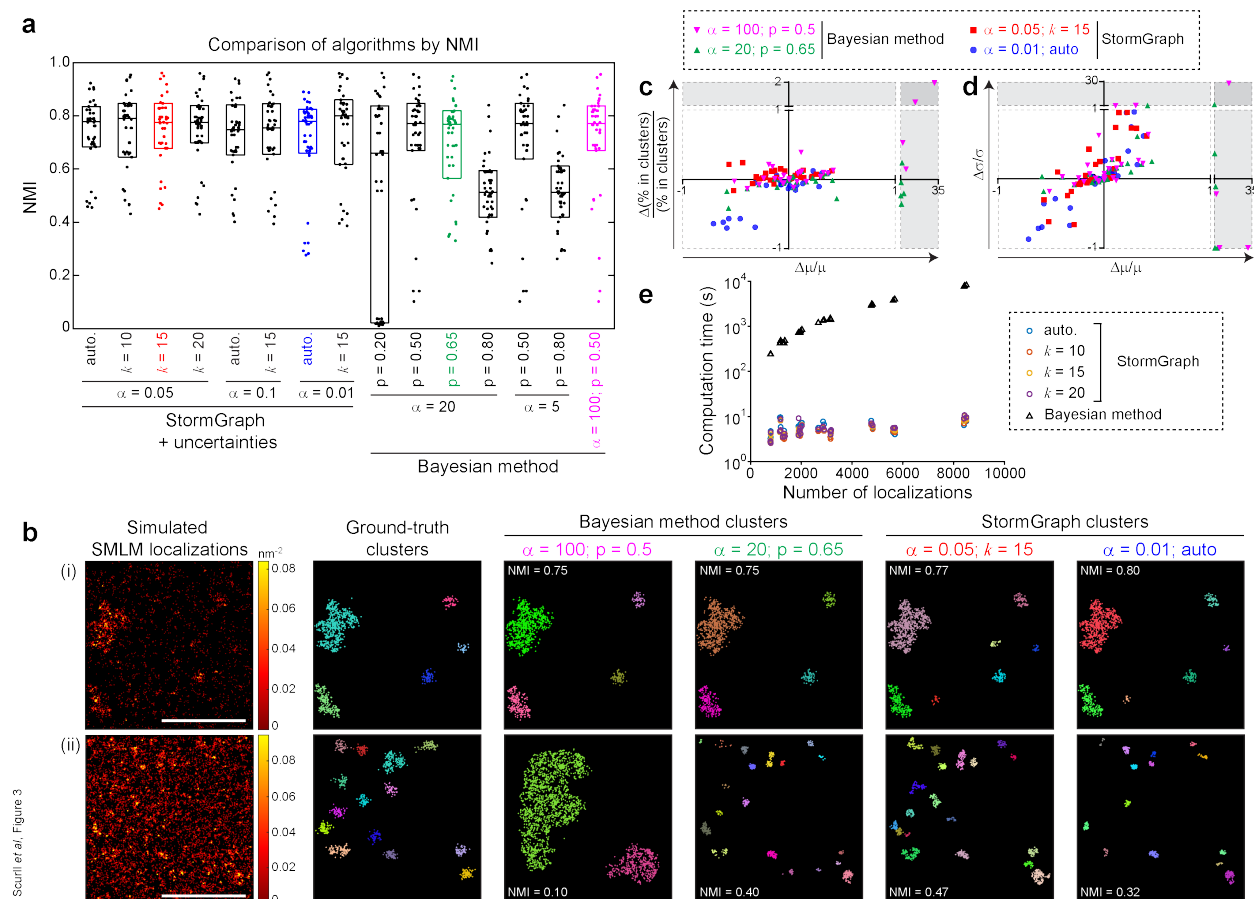

Figure 3: **StormGraph is much faster and more suitable for diverse ROIs than the Bayesian method.** (a) Normalized mutual information (NMI) values measuring the performances of StormGraph and the Bayesian method at assigning localizations to clusters compared to ground truth (NMI = 1  $\implies$  100% match) for 30 simulated  $1 \mu\text{m} \times 1 \mu\text{m}$  ROIs. StormGraph was implemented using (+) localization uncertainties and using either the heuristic method (auto.) or the kNN method ( $k = 10, 15, \text{ or } 20$ ) to set  $r_0$ . Three values of the per-localization significance parameter  $\alpha$  were tested: 0.01, 0.05, and 0.1. For the Bayesian method, the prior  $p$  and the Dirichlet concentration parameter  $\alpha$  were varied. See the main text for full details of inputs to the Bayesian method. (b) Two examples from the 30 simulated ROIs (left-most panels, color bar = density, scale bar = 500 nm), their ground-truth clusters, and clusters detected by the Bayesian method and StormGraph, each using two different parameter selections. Corresponding NMI values are shown. Top: an ROI with close-to-average NMI values for all clustering results. Bottom: an ROI with relatively poor NMI values for all clustering results. For the Bayesian method, clusters are shown for the tested parameters with the overall **best mean performance measured by NMI (magenta)** or **best lowest NMI (green)**. For StormGraph, clusters are shown for the **parameters that we recommend (red)** and for the tested parameters with the **worst lowest NMI (blue)**. N.B. for the bottom ROI, the figure shows the **worst StormGraph results (blue parameters)** and the **best Bayesian method results (green parameters)**. Continued on next page.



Figure 3: **(c–d)** Cluster quantification errors by StormGraph and the Bayesian method relative to ground truth. The fractional error in the percentage of localizations assigned to clusters (c) and the fractional error in the standard deviation,  $\sigma$ , of number of localizations per cluster (d) are plotted *versus* the fractional error in the mean number of localizations per cluster,  $\mu$ , for each of the 30 simulated ROIs. N.b.  $\pm 1$  means  $\pm 100\%$  error, and errors greater than 100% are shown in the shaded regions, which have different axis scales. The parameter selections correspond to the highlighted parameters in (a–b). The blue dots in the bottom left of the plots represent the worst StormGraph results achieved by any of the tested parameters, whereas only the best Bayesian method results are shown. **(e)** Computation time taken by StormGraph (+ uncertainties;  $\alpha = 0.05$ ) and the Bayesian method (default parameters but reduced number of cluster proposals) to analyze simulated ROIs *versus* number of localizations. Computations were performed on a standard desktop computer with 16 GB RAM and running Ubuntu 16.04 on a solid-state drive.



Figure 4.

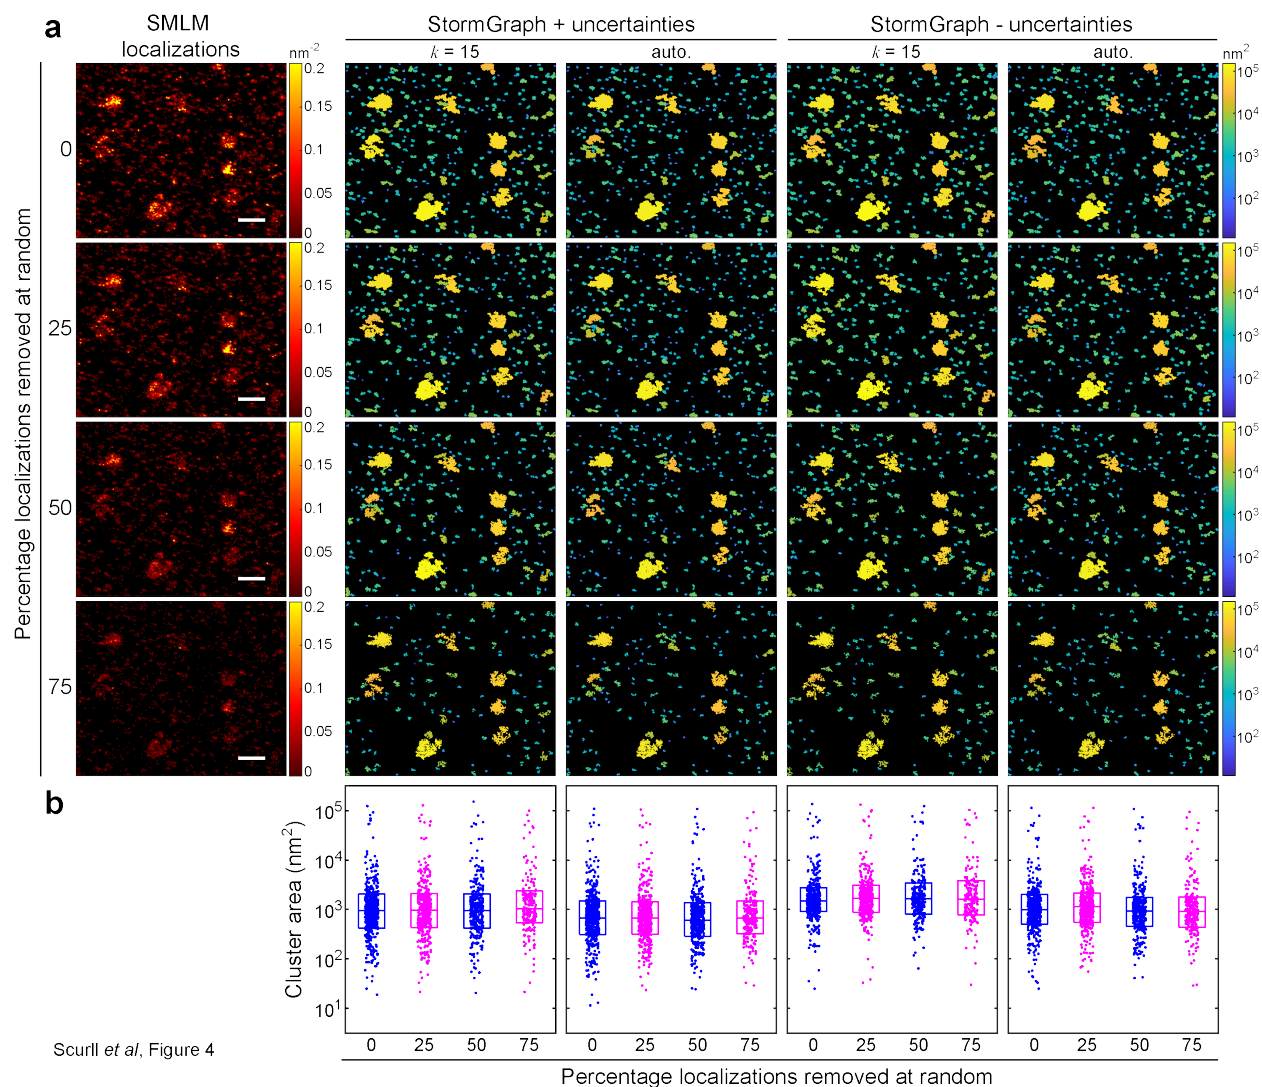

Figure 4: **StormGraph results are not sensitive to the global average density of localizations.** (a) 0%, 25%, 50% or 75% of the localizations were randomly removed from an ROI from real dSTORM data of IgM-BCRs (immunolabeled using Alexa Fluor 647) on an HBL-1 cell (left panels; color bar = density ( $\text{nm}^{-2}$ )). StormGraph was then applied to detect clusters and calculate their areas (remaining panels; color bar = cluster area ( $\text{nm}^2$ )). Localization uncertainties were either used (+) or not used (-) during cluster detection and the value of  $r_0$  was set using either the kNN method with  $k = 15$  or the heuristic method (auto.). Scale bar = 500 nm. (b) Cluster areas quantified by each implementation of StormGraph for each of the four datasets, showing that the distribution of quantified cluster areas was not significantly affected by the random removal of localizations ( $p > 0.05$  as determined by two-sample Kolmogorov-Smirnov tests). Boxes show medians and interquartile ranges.

Figure 5.

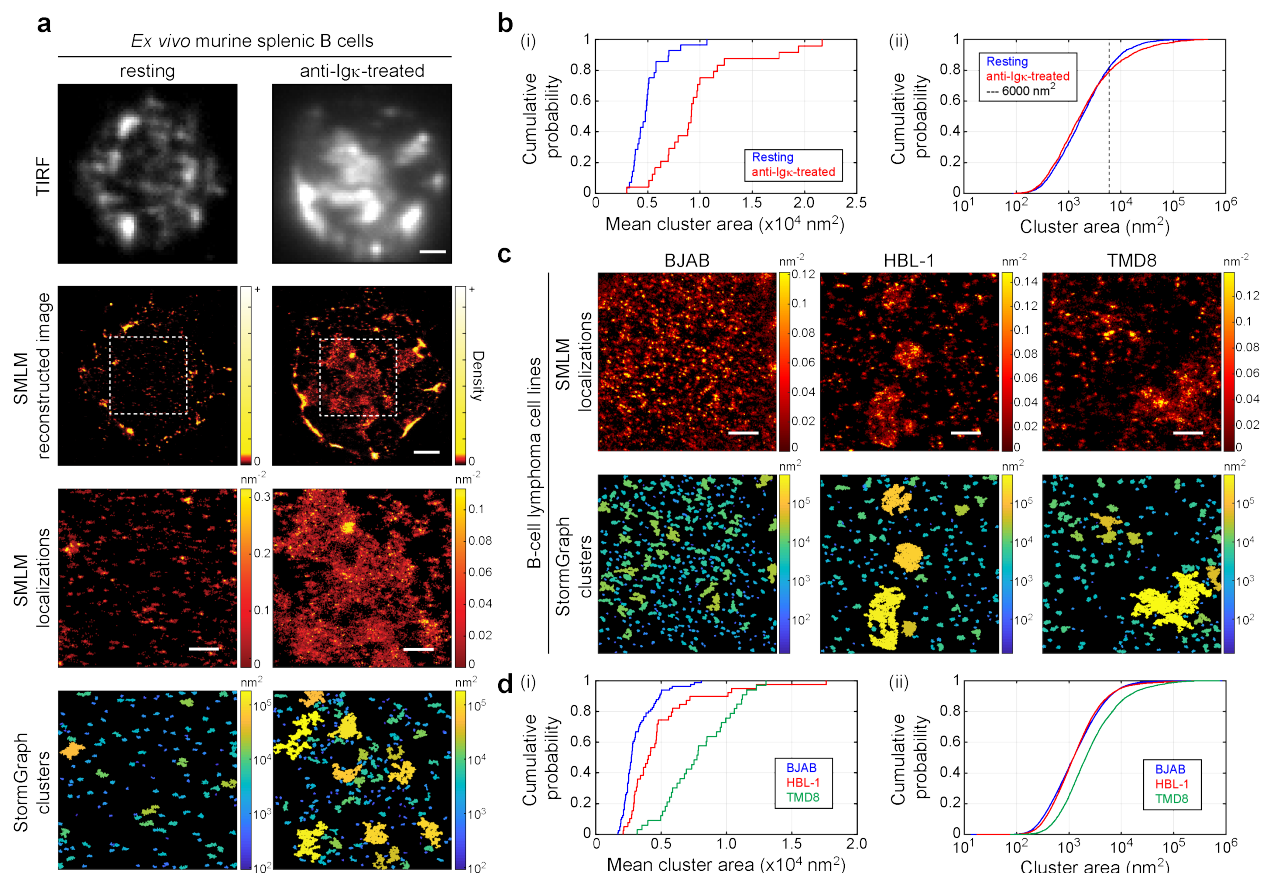

Scurll et al, Figure 5

Figure 5: StormGraph analysis of IgM-isotype B-cell antigen receptors (IgM-BCRs) on *ex vivo* murine splenic B cells and human B-lymphoma cell lines imaged using dSTORM. (a) IgM-BCRs, immunolabeled using Alexa Fluor 647, on *ex vivo* murine splenic B cells that were either left untreated (resting; left panels) or treated with bivalent anti-Ig $\kappa$  antibodies (anti-Ig $\kappa$ -treated; right panels). Cells were imaged first by total internal reflection fluorescence (TIRF) microscopy (top row) and then by dSTORM (second row; images reconstructed from dSTORM localizations). Scale bar = 1  $\mu$ m. Third row: IgM-BCR dSTORM localizations in the ROIs (dashed white boxes) in the second row. Scale bar = 500 nm, color bar = localization density (nm $^{-2}$ ). Bottom row: Clusters identified by StormGraph, colored by their areas (nm $^2$ ). (b) Cumulative distribution functions (CDFs) for cluster areas in ROIs from 28 resting (blue) and 24 anti-Ig $\kappa$ -treated (red) *ex vivo* murine splenic B cells. Panel (i) shows the mean cluster area in each ROI ( $p < 10^{-5}$ ). Panel (ii) shows all cluster areas from all ROIs. The increased mean cluster areas in anti-Ig $\kappa$ -treated cells compared to resting cells is due to clusters larger than  $\sim 6000$  nm $^2$ . (c) StormGraph analysis of IgM-BCRs imaged by dSTORM on resting BJAB, HBL-1 and TMD8 cells. Top: ROIs containing IgM-BCR dSTORM localizations from a representative BJAB Burkitt's lymphoma cell or from HBL-1 and TMD8 ABC DLBCL cells. Scale bars = 500 nm, color bar = density (nm $^{-2}$ ). Bottom: Clusters identified by StormGraph, colored by their areas (nm $^2$ ). (d) CDFs for cluster areas in ROIs from 81 BJAB (blue), 39 HBL-1 (red), and 33 TMD8 (green) cells. Panel (i) shows the mean cluster area in each ROI (HBL-1 vs BJAB:  $p < 10^{-4}$ ; TMD8 vs BJAB:  $p < 10^{-14}$ ). Panel (ii) shows the areas of all clusters in all ROIs. The larger mean area of clusters on HBL-1 cells compared to BJAB cells is due to small numbers of very large clusters. All StormGraph results shown here were generated using localization uncertainties,  $k = 15$ ,  $\alpha = 0.05$ , and MinCluSize = 5.

Figure 6.

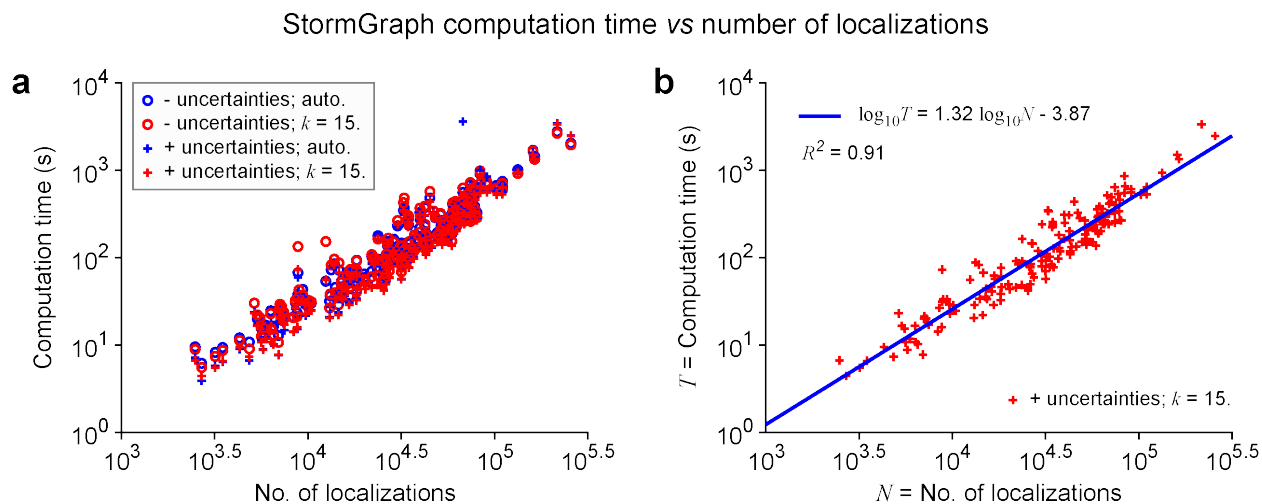

Scurll *et al*, Figure 6

Figure 6: **Relationship between computation time for StormGraph and number of localizations in an ROI.** (a) Scatter plot on logarithmic axes of computation times *versus* number of localization for different implementations of StormGraph. Computations were for the actual dSTORM data analyzed and presented in Figure 5 and were performed on a standard desktop computer with 16 GB of RAM and running Ubuntu 16.04 on a solid-state drive (SSD). (b) A linear relationship fitted to the logarithm of computation time *versus* the logarithm of the number of localizations  $N$  in an ROI shows that StormGraph with our recommended settings (using localization uncertainties,  $k = 15$ ,  $\alpha = 0.05$ ) has an empirical time complexity of approximately  $\mathcal{O}(N^{1.32})$ .

Figure 7.

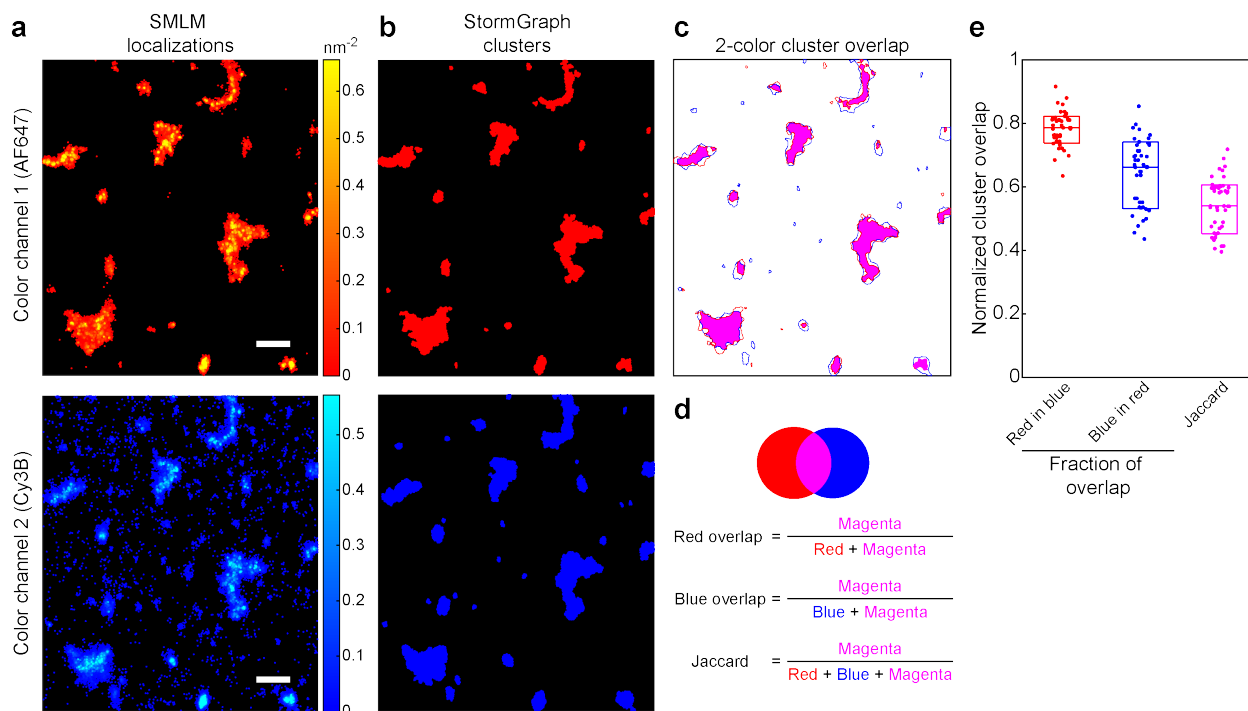

Scurll *et al*, Figure 7

Figure 7: **Two-color cluster overlap analysis using StormGraph.** (a) IgG-isotype B-cell antigen receptors (IgG-BCRs) on A20 B cells were labeled simultaneously with bivalent anti-IgG antibodies that were conjugated to either AF647 (top panel; red) or Cy3B (bottom panel; pseudo-colored blue) and then imaged using dSTORM. Bivalent antibodies were used to induce clustering, since each antibody can bind up to two IgG-BCRs. The IgG-BCR dSTORM localizations in an ROI from one representative cell were analyzed using StormGraph. Scale bar = 500 nm, color bars = density ( $\text{nm}^{-2}$ ). (b) Binary images of the AF647 (top) and Cy3B (bottom) clusters identified by StormGraph in the ROI shown in (a). (c) Merged image of the outlines of the AF647 clusters (red) and Cy3B clusters (blue) identified by StormGraph, with the overlapping areas colored in magenta. (d) Pictorial description of the three area-based cluster overlap scores calculated by StormGraph, in the same order as the columns in panel (e). (e) Cluster overlap scores calculated using the formulae in panel (d) for 31 StormGraph-analyzed ROIs from multiple A20 cells imaged in the same experiment. Each ROI contributes one dot to each column. Boxes show medians and interquartile ranges. These scores determine the maximum observable overlap that could be expected for clusters of IgG-BCRs and a different molecule labeled using these same two fluorophores on A20 cells, imaged using the same imaging setup and analyzed by StormGraph.

Figure 8.

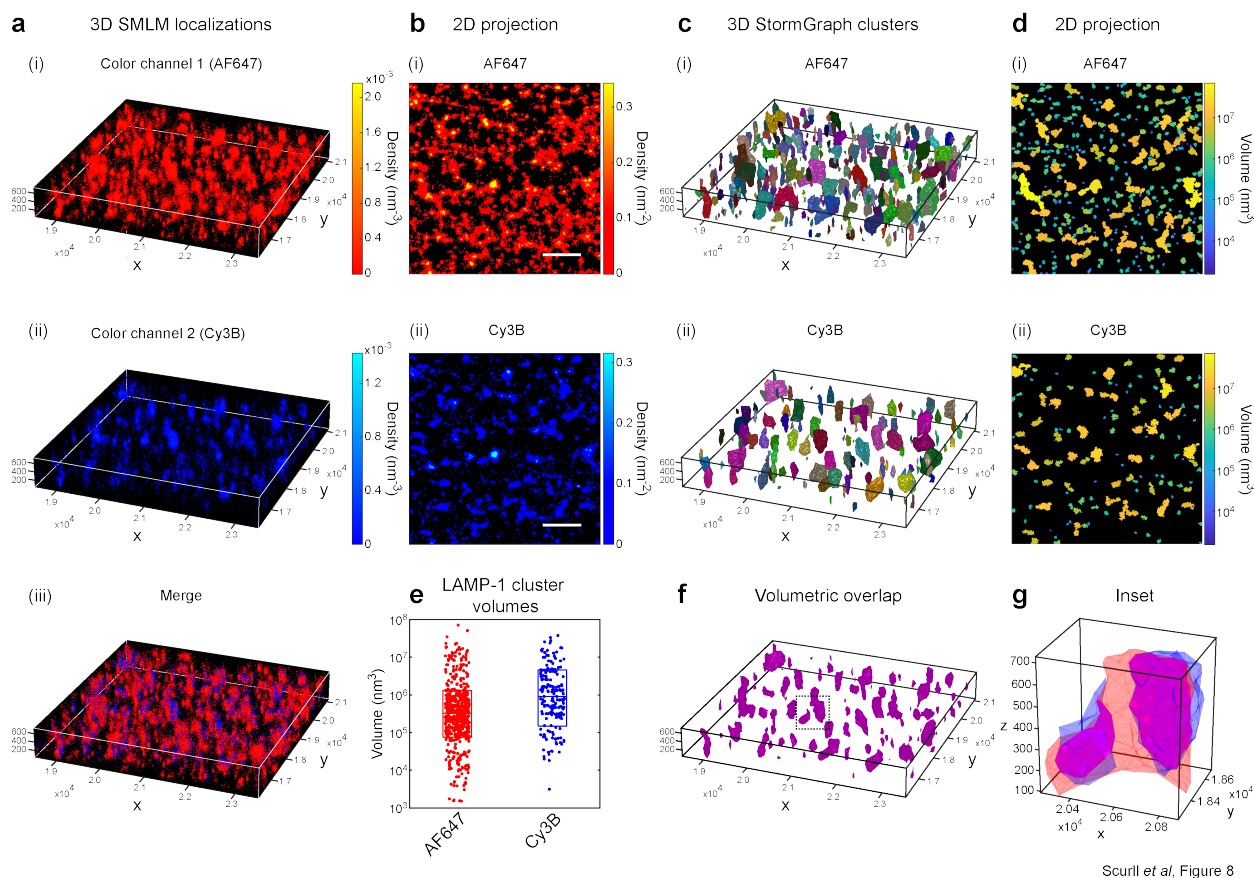

Scurll *et al*, Figure 8

Figure 8: **Analysis of 3D SMLM data using StormGraph.** (a) Localizations of intracellular LAMP-1 labeled simultaneously by two different fluorophores in a B16 murine melanoma cell imaged by two-color 3D dSTORM. LAMP-1 molecules were stained using anti-LAMP-1 primary antibodies and a 1:1 mixture of the same secondary antibody conjugated to either (i) AF647 (red) or (ii) Cy3B (pseudo-colored blue). A  $5 \mu\text{m} \times 5 \mu\text{m} \times 700 \text{nm}$  ROI from one cell was selected for analysis. Color bars = density ( $\text{nm}^{-3}$ ). (iii) Merge. (b) 2D projections of the (i) AF647 and (ii) Cy3B localization data onto the  $xy$ -plane. Color bars = density ( $\text{nm}^{-2}$ ). Scale bar =  $1 \mu\text{m}$ . (c) (i) AF647 and (ii) Cy3B clusters found by StormGraph using localization uncertainties,  $k = 15$ ,  $\alpha = 0.1$ , and  $\text{MinCluSize} = 5$  localizations. Clusters of localizations that could not be confidently distinguished from a single, multiply counted fluorescent probe were automatically removed by StormGraph. Colors distinguish different clusters. (d) 2D projections of the clusters shown in panel (c) colored according to their 3D volumes ( $\text{nm}^3$ ). (e) All volumes, as colored in (d), of individual AF647 and Cy3B clusters detected by StormGraph. Boxes show medians and interquartile ranges. (f) Overlapping volumes (magenta) of the AF647 and Cy3B clusters in panel (c). (g) Enlarged region showing overlap (magenta) between one AF647 cluster (red) and two Cy3B clusters (pseudo-colored blue).
